# Supplementary material
Source: PubMed Central journal article supplement (PMC2604837)
Supplement: 90510.2008_1.pdf [file 90510.2008_1.pdf]

**Supplemental Table 1.** All proteins identified in rat IMCD by mass spectrometry. For each fraction, both the number of total peptide IDs (#Ids) and the number of unique peptide IDs (#Peptides) are shown. These values are not normalized by molecular weight.

| Protein Name                                                                       | Gene Symbol | Accession Number | 4K        |      | 17K       |      | 200K      |      | Sup       |      |
|------------------------------------------------------------------------------------|-------------|------------------|-----------|------|-----------|------|-----------|------|-----------|------|
|                                                                                    |             |                  | #Peptides | #Ids | #Peptides | #Ids | #Peptides | #Ids | #Peptides | #Ids |
| 5-aminoimidazole-4-carboxamide ribonucleotide formyltransferase/IMP cyclohydrolase | Atic        | NP_112276.2      | 0         | 0    | 0         | 0    | 0         | 0    | 2         | 3    |
| 6-pyruvoyl-tetrahydropterin synthase                                               | Pts         | NP_058916.1      | 0         | 0    | 0         | 0    | 0         | 0    | 1         | 2    |
| abhydrolase domain containing 14b                                                  | Abhd14b     | NP_001007665.1   | 0         | 0    | 0         | 0    | 0         | 0    | 1         | 1    |
| acetyl-coenzyme A carboxylase alpha                                                | Acaca       | NP_071529.1      | 1         | 1    | 0         | 0    | 0         | 0    | 0         | 0    |
| acid phosphatase 1, soluble                                                        | Acp1        | NP_067085.1      | 0         | 0    | 0         | 0    | 0         | 0    | 1         | 1    |
| acid phosphatase 2, lysosomal                                                      | Acp2        | NP_058684.1      | 0         | 0    | 1         | 1    | 1         | 1    | 0         | 0    |
| acidic ribosomal phosphoprotein P0                                                 | Arbp        | NP_071797.1      | 0         | 0    | 0         | 0    | 2         | 2    | 0         | 0    |
| aconitase 1                                                                        | Aco1        | NP_059017.1      | 0         | 0    | 0         | 0    | 0         | 0    | 5         | 14   |
| aconitase 2, mitochondrial                                                         | Aco2        | NP_077374.2      | 6         | 7    | 0         | 0    | 0         | 0    | 1         | 1    |
| actin related protein 2/3 complex, subunit 1B                                      | Arpc1b      | NP_062162.1      | 0         | 0    | 0         | 0    | 1         | 1    | 0         | 0    |
| actin related protein 2/3 complex, subunit 3                                       | Arpc3       | NP_001099403.1   | 1         | 1    | 0         | 0    | 1         | 1    | 0         | 0    |
| actin, alpha 1, skeletal muscle                                                    | Acta1       | NP_062085.1      | 14        | 28   | 11        | 32   | 7         | 12   | 7         | 14   |
| actin, beta                                                                        | Actb        | NP_112406.1      | 4         | 10   | 4         | 5    | 3         | 4    | 5         | 7    |
| actin, beta-like 2                                                                 | Actbl2      | NP_001099879.1   | 1         | 1    | 0         | 0    | 0         | 0    | 0         | 0    |
| actinin, alpha 1                                                                   | Actn1       | NP_112267.1      | 2         | 3    | 0         | 0    | 1         | 1    | 7         | 13   |
| acyl-Coenzyme A binding domain containing 3                                        | Acbd3       | NP_878263.1      | 0         | 0    | 0         | 0    | 0         | 0    | 1         | 2    |
| acyl-Coenzyme A dehydrogenase, long-chain                                          | Acadl       | NP_036951.1      | 1         | 1    | 0         | 0    | 0         | 0    | 0         | 0    |
| adaptor protein complex AP-1, beta 1 subunit                                       | Ap1b1       | NP_058973.1      | 0         | 0    | 0         | 0    | 2         | 3    | 2         | 3    |
| adaptor protein complex AP-2, alpha 2 subunit                                      | Ap2a2       | NP_112270.2      | 1         | 1    | 0         | 0    | 3         | 3    | 0         | 0    |
| adaptor-related protein complex 2, beta 1 subunit                                  | Ap2b1       | NP_542150.1      | 0         | 0    | 0         | 0    | 1         | 1    | 1         | 1    |
| adenosine kinase                                                                   | Adk         | NP_037027.2      | 0         | 0    | 0         | 0    | 0         | 0    | 1         | 1    |
| adenosine monophosphate deaminase 3                                                | Ampd3       | NP_113732.1      | 0         | 0    | 0         | 0    | 3         | 3    | 1         | 2    |
| adhesion regulating molecule 1                                                     | Adrm1       | NP_113896.1      | 0         | 0    | 0         | 0    | 1         | 1    | 0         | 0    |
| ADP-ribosylation factor 1                                                          | Arf1        | NP_071963.1      | 1         | 1    | 0         | 0    | 0         | 0    | 4         | 6    |
| ADP-ribosylation factor 4                                                          | Arf4        | NP_077065.1      | 1         | 1    | 0         | 0    | 0         | 0    | 1         | 2    |
| ADP-ribosylation factor 5                                                          | Arf5        | NP_077063.1      | 1         | 2    | 1         | 2    | 1         | 1    | 0         | 0    |
| albumin                                                                            | Alb         | NP_599153.2      | 7         | 9    | 13        | 18   | 5         | 5    | 19        | 31   |
| aldehyde dehydrogenase 1 family, member L1                                         | Aldh1l1     | NP_071992.1      | 1         | 1    | 0         | 0    | 1         | 1    | 1         | 1    |
| aldehyde dehydrogenase 9 family, member A1                                         | Aldh9a1     | NP_071609.2      | 0         | 0    | 0         | 0    | 1         | 1    | 0         | 0    |
| aldehyde dehydrogenase family 1, subfamily A1                                      | Aldh1a1     | NP_071852.2      | 0         | 0    | 0         | 0    | 2         | 2    | 1         | 1    |
| aldehyde dehydrogenase family 1, subfamily A2                                      | Aldh1a2     | NP_446348.1      | 0         | 0    | 0         | 0    | 0         | 0    | 1         | 2    |
| aldehyde dehydrogenase family 1, subfamily A3                                      | Aldh1a3     | NP_695212.1      | 0         | 0    | 0         | 0    | 5         | 6    | 6         | 7    |
| aldehyde dehydrogenase family 1, subfamily A7                                      | Aldh1a7     | NP_058968.14     | 0         | 0    | 0         | 0    | 1         | 2    | 0         | 0    |
| aldehyde dehydrogenase family 3, subfamily A2                                      | Aldh3a2     | NP_113919.1      | 1         | 1    | 1         | 1    | 0         | 0    | 0         | 0    |
| aldehyde dehydrogenase family 6, subfamily A1                                      | Aldh6a1     | NP_112319.2      | 4         | 5    | 0         | 0    | 0         | 0    | 0         | 0    |
| aldehyde reductase 1                                                               | Akr1b1      | NP_036630.1      | 7         | 14   | 6         | 15   | 4         | 6    | 12        | 53   |
| aldo-keto reductase family 1, member B8                                            | Akr1b8      | NP_775159.1      | 0         | 0    | 0         | 0    | 0         | 0    | 3         | 5    |
| aldo-keto reductase family 7, member A2 (aflatoxin aldehyde reductase)             | Akr7a2      | NP_599234.1      | 0         | 0    | 0         | 0    | 0         | 0    | 1         | 1    |
| aldo-keto reductase family 7, member A3 (aflatoxin aldehyde reductase)             | Akr7a3      | NP_037347.1      | 0         | 0    | 0         | 0    | 0         | 0    | 1         | 1    |
| aldolase A, fructose-bisphosphate                                                  | Aldoa       | NP_036627.1      | 1         | 1    | 0         | 0    | 5         | 6    | 4         | 6    |
| alpha actinin 4                                                                    | Actn4       | NP_113863.2      | 1         | 1    | 0         | 0    | 0         | 0    | 11        | 19   |
| alpha isoform of regulatory subunit A, protein phosphatase 2                       | Ppp2r1a     | NP_476481.1      | 1         | 1    | 0         | 0    | 1         | 1    | 0         | 0    |
| alpha-spectrin 2                                                                   | Spna2       | NP_741984.2      | 16        | 20   | 12        | 15   | 14        | 17   | 29        | 44   |
| aminopeptidase Fxna                                                                | Ermp1       | NP_908939.2      | 1         | 1    | 0         | 0    | 0         | 0    | 0         | 0    |
| aminopeptidase puromycin sensitive                                                 | Npepps      | NP_536320.1      | 0         | 0    | 0         | 0    | 0         | 0    | 5         | 7    |
| annexin A1                                                                         | Anxa1       | NP_037036.1      | 1         | 1    | 4         | 5    | 0         | 0    | 6         | 13   |
| annexin A10                                                                        | Anxa10      | NP_001102580.1   | 0         | 0    | 0         | 0    | 0         | 0    | 1         | 1    |
| annexin A11                                                                        | Anxa11      | NP_001011918.1   | 1         | 1    | 0         | 0    | 0         | 0    | 0         | 0    |
| annexin A2                                                                         | Anxa2       | NP_063970.1      | 6         | 18   | 10        | 29   | 4         | 5    | 6         | 19   |
| annexin A4                                                                         | Anxa4       | NP_077069.3      | 1         | 1    | 2         | 2    | 0         | 0    | 6         | 12   |
| annexin A5                                                                         | Anxa5       | NP_037264.1      | 0         | 0    | 2         | 2    | 0         | 0    | 6         | 14   |
| annexin A6                                                                         | Anxa6       | NP_077070.2      | 1         | 1    | 3         | 3    | 0         | 0    | 10        | 12   |
| annexin A7                                                                         | Anxa7       | NP_569100.2      | 0         | 0    | 0         | 0    | 0         | 0    | 1         | 1    |
| aplysia ras-related homolog A2                                                     | Rhoa        | NP_476473.1      | 0         | 0    | 0         | 0    | 0         | 0    | 4         | 5    |
| apoptosis-inducing factor, mitochondrion-associated 1                              | Aifm1       | NP_112646.1      | 4         | 4    | 0         | 0    | 0         | 0    | 0         | 0    |
| aquaporin 1                                                                        | Aqp1        | NP_036910.1      | 1         | 1    | 0         | 0    | 0         | 0    | 0         | 0    |
| aquaporin 2                                                                        | Aqp2        | NP_037044.2      | 0         | 0    | 3         | 8    | 1         | 1    | 0         | 0    |
| aquaporin 4                                                                        | Aqp4        | NP_036957.1      | 0         | 0    | 1         | 1    | 0         | 0    | 0         | 0    |
| archain                                                                            | Arcn1       | NP_001007663.1   | 0         | 0    | 1         | 1    | 2         | 3    | 1         | 1    |
| arginine-tRNA-protein transferase 1                                                | Ate1        | NP_001099770.1   | 0         | 0    | 0         | 0    | 0         | 0    | 1         | 1    |
| arginyl aminopeptidase (aminopeptidase B)                                          | Rnpep       | NP_112359.1      | 0         | 0    | 1         | 1    | 0         | 0    | 10        | 12   |
| arginyl-tRNA synthetase                                                            | Rars        | NP_001099247.2   | 0         | 0    | 0         | 0    | 3         | 3    | 0         | 0    |
| aspartyl aminopeptidase                                                            | Dnpep       | NP_001020050.1   | 0         | 0    | 0         | 0    | 2         | 3    | 0         | 0    |

|                                                                                          |           |                |    |    |    |    |   |    |    |    |
|------------------------------------------------------------------------------------------|-----------|----------------|----|----|----|----|---|----|----|----|
| ATP synthase, H+ transporting, mitochondrial F0 complex, subunit B1                      | Atp5f1    | NP_599192.1    | 1  | 1  | 2  | 3  | 0 | 0  | 0  | 0  |
| ATP synthase, H+ transporting, mitochondrial F0 complex, subunit d                       | Atp5h     | NP_062256.1    | 2  | 2  | 0  | 0  | 0 | 0  | 0  | 0  |
| ATP synthase, H+ transporting, mitochondrial F1 complex, alpha subunit 1, cardiac muscle | Atp5a1    | NP_075581.1    | 6  | 9  | 1  | 1  | 0 | 0  | 0  | 0  |
| ATP synthase, H+ transporting, mitochondrial F1 complex, beta subunit                    | Atp5b     | NP_599191.1    | 4  | 5  | 2  | 2  | 0 | 0  | 0  | 0  |
| ATP synthase, H+ transporting, mitochondrial F1 complex, delta subunit precursor         | Atp5d     | NP_620806.1    | 1  | 1  | 1  | 1  | 0 | 0  | 0  | 0  |
| ATP synthase, H+ transporting, mitochondrial F1 complex, gamma subunit                   | Atp5c1    | NP_446277.1    | 1  | 1  | 0  | 0  | 0 | 0  | 0  | 0  |
| ATPase, Ca++ transporting, cardiac muscle, slow twitch 2 isoform a                       | Atp2a2    | NP_001104293.1 | 0  | 0  | 1  | 1  | 0 | 0  | 0  | 0  |
| ATPase, H transporting, lysosomal V1 subunit A                                           | Atp6v1a1  | NP_001101788.1 | 1  | 1  | 3  | 3  | 1 | 1  | 0  | 0  |
| ATPase, H transporting, lysosomal V1 subunit B1                                          | Atp6v1b1  | NP_001101337.2 | 0  | 0  | 1  | 1  | 0 | 0  | 0  | 0  |
| ATPase, H+ transporting, lysosomal V1 subunit H                                          | Atp6v1h   | NP_001013951.1 | 0  | 0  | 1  | 2  | 1 | 2  | 0  | 0  |
| ATPase, Na+/K+ transporting, alpha 1 polypeptide                                         | Atp1a1    | NP_036636.1    | 12 | 18 | 9  | 21 | 1 | 1  | 0  | 0  |
| ATPase, Na+/K+ transporting, beta 1 polypeptide                                          | Atp1b1    | NP_037245.2    | 4  | 4  | 3  | 4  | 0 | 0  | 0  | 0  |
| ATP-binding cassette, sub-family A (ABC1), member 4                                      | Abca4     | NP_001101191.1 | 0  | 0  | 0  | 0  | 0 | 0  | 1  | 1  |
| ATP-binding cassette, sub-family E (OABP), member 1                                      | Abce1     | NP_001101916.1 | 0  | 0  | 1  | 2  | 1 | 2  | 0  | 0  |
| basal cell adhesion molecule                                                             | Bcam      | NP_113940.1    | 2  | 5  | 2  | 4  | 1 | 1  | 0  | 0  |
| beta-glo                                                                                 | MGC72973  | NP_942071.1    | 0  | 0  | 0  | 0  | 0 | 0  | 3  | 5  |
| beta-globin                                                                              | LOC689064 | NP_001104739.1 | 0  | 0  | 1  | 1  | 0 | 0  | 3  | 6  |
| brain glycogen phosphorylase                                                             | Pygb      | NP_037320.1    | 0  | 0  | 0  | 0  | 3 | 3  | 10 | 19 |
| calmodulin 2                                                                             | Calm2     | NP_059022.1    | 2  | 2  | 0  | 0  | 0 | 0  | 0  | 0  |
| calnexin                                                                                 | Canx      | NP_742005.1    | 2  | 2  | 5  | 9  | 1 | 1  | 0  | 0  |
| calpain 1, large subunit                                                                 | Capn1     | NP_062025.1    | 0  | 0  | 0  | 0  | 0 | 0  | 6  | 8  |
| calpain 2                                                                                | Capn2     | NP_058812.1    | 1  | 1  | 1  | 2  | 0 | 0  | 7  | 10 |
| calpain, small subunit 1                                                                 | Capns1    | NP_058814.1    | 0  | 0  | 1  | 1  | 1 | 1  | 1  | 2  |
| calponin 3, acidic                                                                       | Cnn3      | NP_062232.1    | 0  | 0  | 1  | 2  | 0 | 0  | 2  | 2  |
| calreticulin                                                                             | Calr      | NP_071794.1    | 3  | 5  | 2  | 4  | 1 | 1  | 2  | 2  |
| CAP, adenylate cyclase-associated protein 1                                              | Cap1      | NP_071778.2    | 1  | 1  | 0  | 0  | 8 | 11 | 4  | 6  |
| capping protein (actin filament), gelsolin-like                                          | Capg      | NP_001013104.1 | 0  | 0  | 1  | 1  | 0 | 0  | 4  | 6  |
| carbonic anhydrase II                                                                    | Car2      | NP_062164.1    | 0  | 0  | 0  | 0  | 0 | 0  | 2  | 4  |
| carboxylesterase 2                                                                       | Ces2      | NP_598270.1    | 1  | 1  | 1  | 2  | 0 | 0  | 0  | 0  |
| carnitine palmitoyltransferase 1a, liver                                                 | Cpt1a     | NP_113747.2    | 1  | 1  | 0  | 0  | 0 | 0  | 0  | 0  |
| catalase                                                                                 | Cat       | NP_036652.1    | 0  | 0  | 1  | 1  | 0 | 0  | 0  | 0  |
| catenin (cadherin associated protein), alpha 2                                           | Ctnna2    | NP_001100068.1 | 1  | 1  | 2  | 2  | 0 | 0  | 0  | 0  |
| catenin (cadherin-associated protein), alpha 1, 102kDa                                   | Ctnna1    | NP_001007146.1 | 1  | 1  | 0  | 0  | 0 | 0  | 0  | 0  |
| cathepsin B preproprotein                                                                | Ctsb      | NP_072119.2    | 1  | 2  | 0  | 0  | 0 | 0  | 0  | 0  |
| cathepsin D                                                                              | Ctsd      | NP_599161.2    | 1  | 1  | 1  | 1  | 0 | 0  | 0  | 0  |
| CD151 molecule (Raph blood group)                                                        | Cd151     | NP_071968.1    | 0  | 0  | 1  | 1  | 0 | 0  | 0  | 0  |
| CD59b molecule, complement regulatory protein                                            | Cd59b     | NP_037057.1    | 0  | 0  | 1  | 1  | 0 | 0  | 0  | 0  |
| CD9 antigen                                                                              | Cd9       | NP_444177.1    | 0  | 0  | 1  | 3  | 0 | 0  | 0  | 0  |
| Cdc42-binding protein kinase beta                                                        | Cdc42bpb  | NP_446072.2    | 0  | 0  | 1  | 1  | 0 | 0  | 0  | 0  |
| cell death-inducing DFFA-like effector c                                                 | Cidec     | NP_001019504.1 | 1  | 1  | 0  | 0  | 0 | 0  | 0  | 0  |
| cell division cycle 42                                                                   | Cdc42     | NP_741991.3    | 1  | 1  | 1  | 1  | 0 | 0  | 4  | 5  |
| ceruloplasmin                                                                            | Cp        | NP_036664.1    | 1  | 1  | 4  | 5  | 0 | 0  | 0  | 0  |
| chaperonin containing TCP1, subunit 2 (beta)                                             | Cct2      | NP_001005905.1 | 0  | 0  | 0  | 0  | 1 | 1  | 0  | 0  |
| chaperonin containing TCP1, subunit 3 (gamma)                                            | Cct3      | NP_954522.1    | 0  | 0  | 0  | 0  | 5 | 12 | 0  | 0  |
| chaperonin containing TCP1, subunit 5 (epsilon)                                          | Cct5      | NP_001004078.1 | 1  | 1  | 0  | 0  | 1 | 1  | 0  | 0  |
| chaperonin subunit 4 (delta)                                                             | Cct4      | NP_877966.1    | 0  | 0  | 0  | 0  | 2 | 2  | 0  | 0  |
| chaperonin subunit 6a (zeta)                                                             | Cct6a     | NP_001028856.1 | 0  | 0  | 0  | 0  | 3 | 3  | 0  | 0  |
| chaperonin subunit 7 (eta)                                                               | Cct7      | NP_001100073.1 | 0  | 0  | 0  | 0  | 4 | 5  | 0  | 0  |
| chaperonin subunit 8 (theta)                                                             | Cct8      | NP_001099367.1 | 0  | 0  | 0  | 0  | 2 | 2  | 0  | 0  |
| chloride intracellular channel 1                                                         | Clc1      | NP_001002807.1 | 0  | 0  | 0  | 0  | 0 | 0  | 2  | 2  |
| choline dehydrogenase precursor                                                          | Chdh      | NP_942026.1    | 2  | 2  | 0  | 0  | 0 | 0  | 0  | 0  |
| choline/ethanolamine phosphotransferase 1                                                | Cept1     | NP_001007700.1 | 1  | 1  | 0  | 0  | 0 | 0  | 0  | 0  |
| chromosome segregation 1-like                                                            | Cse1l     | NP_001102077.1 | 0  | 0  | 0  | 0  | 0 | 0  | 1  | 1  |
| clathrin, heavy polypeptide (Hc)                                                         | Cltc      | NP_062172.1    | 1  | 1  | 10 | 10 | 6 | 7  | 38 | 52 |
| CNDP dipeptidase 2                                                                       | Cndp2     | NP_001010920.1 | 0  | 0  | 0  | 0  | 0 | 0  | 2  | 3  |
| coatamer protein complex, subunit beta 1                                                 | Copb1     | NP_542959.1    | 0  | 0  | 0  | 0  | 1 | 2  | 0  | 0  |
| coatamer protein complex, subunit gamma                                                  | Copg      | NP_001026992.1 | 0  | 0  | 0  | 0  | 1 | 1  | 0  | 0  |
| coatamer protein complex, subunit zeta 1                                                 | Copz1     | NP_001101587.1 | 0  | 0  | 0  | 0  | 1 | 1  | 0  | 0  |
| cofilin 1                                                                                | Cfl1      | NP_058843.1    | 0  | 0  | 0  | 0  | 0 | 0  | 6  | 8  |
| complement component 3                                                                   | C3        | NP_058690.2    | 0  | 0  | 1  | 1  | 0 | 0  | 0  | 0  |

|                                                                                         |          |                |   |   |    |    |    |    |    |    |
|-----------------------------------------------------------------------------------------|----------|----------------|---|---|----|----|----|----|----|----|
| COP9 (constitutive photomorphogenic) homolog, subunit 5                                 | Cops5    | NP_001020866.1 | 0 | 0 | 0  | 0  | 1  | 1  | 0  | 0  |
| coronin, actin-binding protein, 1B                                                      | Coro1b   | NP_062095.1    | 0 | 0 | 0  | 0  | 2  | 3  | 5  | 11 |
| corticosteroid-induced protein precursor crystallin, alpha B                            | Fxyd4    | NP_071783.1    | 0 | 0 | 1  | 1  | 0  | 0  | 0  | 0  |
|                                                                                         | Cryab    | NP_037067.1    | 2 | 2 | 2  | 3  | 3  | 5  | 2  | 3  |
| CTD (carboxy-terminal domain, RNA polymerase II, polypeptide A)                         |          |                |   |   |    |    |    |    |    |    |
| phosphatase, subunit 1                                                                  | Ctdp1    | NP_001099601.1 | 0 | 0 | 0  | 0  | 0  | 0  | 1  | 1  |
| cullin 4B                                                                               | Cul4b    | NP_001100421.1 | 0 | 0 | 0  | 0  | 0  | 0  | 1  | 2  |
| cullin associated and neddylation disassociated 1                                       | Cand1    | NP_446456.1    | 0 | 0 | 0  | 0  | 0  | 0  | 1  | 1  |
| cyclin A1                                                                               | Ccna1    | NP_001011949.1 | 1 | 1 | 0  | 0  | 0  | 0  | 1  | 1  |
| cysteine string protein                                                                 | Dnajc5   | NP_077075.1    | 1 | 1 | 0  | 0  | 0  | 0  | 0  | 0  |
| cytidine 5'-triphosphate synthase 2                                                     | Ctps2    | NP_001030170.1 | 0 | 0 | 0  | 0  | 0  | 0  | 1  | 1  |
| cytochrome b-5                                                                          | Cyb5     | NP_071581.1    | 0 | 0 | 1  | 2  | 0  | 0  | 0  | 0  |
| cytochrome c oxidase subunit II                                                         | COX2     | AP_004895.1    | 1 | 1 | 0  | 0  | 0  | 0  | 0  | 0  |
| cytochrome c oxidase subunit IV isoform 1                                               | Cox4i1   | NP_058898.1    | 0 | 0 | 1  | 2  | 0  | 0  | 0  | 0  |
| cytochrome c oxidase, subunit Va                                                        | Cox5a    | NP_665726.1    | 1 | 1 | 0  | 0  | 0  | 0  | 0  | 0  |
| cytochrome c, somatic                                                                   | Cycs     | NP_036971.1    | 2 | 2 | 0  | 0  | 0  | 0  | 0  | 0  |
| cytoplasmic FMR1 interacting protein 1                                                  | Cyfp1    | NP_001100987.1 | 0 | 0 | 1  | 1  | 0  | 0  | 0  | 0  |
| cytoskeleton-associated protein 4                                                       | Ckap4    | NP_001102210.1 | 0 | 0 | 1  | 1  | 0  | 0  | 0  | 0  |
| D-dopachrome tautomerase                                                                | Ddt      | NP_077045.1    | 0 | 0 | 0  | 0  | 0  | 0  | 1  | 1  |
| DEAD (Asp-Glu-Ala-Asp) box polypeptide 5                                                | Ddx5     | NP_001007614.1 | 0 | 0 | 2  | 2  | 0  | 0  | 0  | 0  |
| DEAD (Asp-Glu-Ala-Asp) box polypeptide 58                                               | Ddx58    | NP_001100115.1 | 0 | 0 | 0  | 0  | 0  | 0  | 1  | 1  |
| DEAD/H (Asp-Glu-Ala-Asp/His) box polypeptide 3, X-linked                                | Ddx3x    | NP_001101716.1 | 0 | 0 | 0  | 0  | 1  | 1  | 0  | 0  |
| destrin                                                                                 | Dstn     | NP_001028838.1 | 1 | 2 | 1  | 2  | 0  | 0  | 4  | 5  |
| dihydropolipoamide dehydrogenase                                                        | Dld      | NP_955417.1    | 2 | 2 | 0  | 0  | 0  | 0  | 0  | 0  |
| dihydropolipoamide S-acetyltransferase (E2 component of pyruvate dehydrogenase complex) | Dlat     | NP_112287.1    | 0 | 0 | 0  | 0  | 1  | 2  | 0  | 0  |
| dihydropyrimidinase-like 2                                                              | Dpysl2   | NP_001099187.1 | 0 | 0 | 0  | 0  | 3  | 5  | 1  | 2  |
| dihydropyrimidinase-like 4                                                              | Dpysl4   | NP_037065.1    | 0 | 0 | 0  | 0  | 1  | 1  | 0  | 0  |
| discs large homolog 1                                                                   | Dlg1     | NP_036920.1    | 1 | 2 | 1  | 1  | 0  | 0  | 0  | 0  |
| dolichyl-di-phosphooligosaccharide-protein glycotransferase                             | Ddost    | NP_001012104.1 | 0 | 0 | 1  | 1  | 0  | 0  | 0  | 0  |
| drebrin-like                                                                            | Dbnl     | NP_112642.1    | 1 | 2 | 0  | 0  | 0  | 0  | 0  | 0  |
| dynactin 1                                                                              | Dctn1    | NP_077044.1    | 0 | 0 | 0  | 0  | 1  | 1  | 1  | 1  |
| dynein cytoplasmic 1 heavy chain 1                                                      | Dync1h1  | NP_062099.3    | 5 | 6 | 2  | 3  | 3  | 4  | 1  | 1  |
| dyskeratosis congenita 1, dyskerin                                                      | Dkc1     | NP_056910.1    | 1 | 1 | 0  | 0  | 0  | 0  | 0  | 0  |
| early endosome antigen 1                                                                | Eea1     | NP_001101556.1 | 0 | 0 | 0  | 0  | 0  | 0  | 3  | 4  |
| echinoderm microtubule associated protein like 2                                        | Eml2     | NP_620276.1    | 0 | 0 | 0  | 0  | 0  | 0  | 4  | 4  |
| EH-domain containing 4                                                                  | Ehd4     | NP_647540.1    | 1 | 1 | 1  | 1  | 1  | 2  | 0  | 0  |
| electron transferring flavoprotein, beta polypeptide                                    | Etfb     | NP_001004220.1 | 1 | 1 | 0  | 0  | 0  | 0  | 0  | 0  |
| endomucin                                                                               | Emcn     | NP_001004228.1 | 0 | 0 | 1  | 2  | 0  | 0  | 0  | 0  |
| enolase 1, alpha non-neuron                                                             | Eno1     | NP_001103378.1 | 2 | 2 | 2  | 4  | 3  | 5  | 10 | 25 |
| enolase 2, gamma, neuronal                                                              | Eno2     | NP_647541.1    | 0 | 0 | 1  | 2  | 0  | 0  | 1  | 2  |
| epoxide hydrolase 1                                                                     | Ephx1    | NP_036976.2    | 0 | 0 | 2  | 2  | 0  | 0  | 0  | 0  |
| EPS8-like 2                                                                             | Eps8l2   | NP_001101978.1 | 1 | 1 | 0  | 0  | 0  | 0  | 1  | 1  |
| erythrocyte protein band 4.1-like 1 isoform S                                           | Epb4.1l1 | NP_742087.1    | 1 | 2 | 1  | 1  | 1  | 1  | 0  | 0  |
| eukaryotic translation elongation factor 1 alpha 1                                      | Eef1a1   | NP_787032.1    | 2 | 2 | 2  | 2  | 4  | 7  | 0  | 0  |
| eukaryotic translation elongation factor 1 alpha 2                                      | Eef1a2   | NP_036792.2    | 3 | 5 | 5  | 6  | 4  | 9  | 1  | 2  |
| eukaryotic translation elongation factor 1 delta                                        | Eef1d    | NP_001013122.1 | 0 | 0 | 0  | 0  | 1  | 1  | 0  | 0  |
| eukaryotic translation elongation factor 2                                              | Eef2     | NP_058941.1    | 0 | 0 | 0  | 0  | 0  | 0  | 8  | 9  |
| eukaryotic translation initiation factor 1A, Y-linked                                   | Eif1ay   | NP_001100433.1 | 0 | 0 | 1  | 1  | 0  | 0  | 0  | 0  |
| eukaryotic translation initiation factor 3, subunit 10 (theta)                          | Eif3s10  | NP_001040552.1 | 0 | 0 | 0  | 0  | 1  | 1  | 0  | 0  |
| eukaryotic translation initiation factor 3, subunit 6 interacting protein               | Eif3s6ip | NP_001029306.1 | 0 | 0 | 0  | 0  | 1  | 1  | 0  | 0  |
| eukaryotic translation initiation factor 3, subunit 9 (eta)                             | Eif3s9   | NP_001026810.1 | 0 | 0 | 0  | 0  | 2  | 2  | 1  | 2  |
| eukaryotic translation initiation factor 3, subunit H                                   | Eif3h    | NP_942046.1    | 0 | 0 | 1  | 1  | 0  | 0  | 0  | 0  |
| eukaryotic translation initiation factor 4H                                             | Eif4h    | NP_001006958.1 | 1 | 2 | 1  | 2  | 0  | 0  | 0  | 0  |
| eukaryotic translation initiation factor 5A                                             | Eif5a    | NP_001028853.1 | 0 | 0 | 0  | 0  | 0  | 0  | 1  | 1  |
| ezrin                                                                                   | Ezr      | NP_062230.1    | 1 | 1 | 2  | 2  | 1  | 1  | 0  | 0  |
| family with sequence similarity 38, member A                                            | Fam38a   | NP_001070668.1 | 1 | 2 | 1  | 1  | 0  | 0  | 0  | 0  |
| fatty acid binding protein 3, muscle and heart                                          | Fabp3    | NP_077076.1    | 0 | 0 | 0  | 0  | 0  | 0  | 2  | 2  |
| fatty acid binding protein 5, epidermal                                                 | Fabp5    | NP_665885.1    | 0 | 0 | 0  | 0  | 0  | 0  | 1  | 1  |
| fibrillin 1                                                                             | Fbn1     | NP_114013.1    | 0 | 0 | 13 | 17 | 12 | 16 | 0  | 0  |
| fibrillin 2                                                                             | Fbn2     | NP_114014.1    | 0 | 0 | 0  | 0  | 1  | 2  | 0  | 0  |
| flamin, beta                                                                            | Flnb     | NP_001100758.1 | 5 | 8 | 7  | 8  | 3  | 3  | 33 | 49 |

|                                                                                     |           |                |   |    |   |    |   |    |    |
|-------------------------------------------------------------------------------------|-----------|----------------|---|----|---|----|---|----|----|
| fission 1 (mitochondrial outer membrane) homolog                                    | Fis1      | NP_001099389.1 | 1 | 1  | 0 | 0  | 0 | 0  | 0  |
| flightless I homolog                                                                | Flii      | NP_001008280.1 | 0 | 0  | 0 | 0  | 0 | 3  | 3  |
| for proteasomal ATPase (SUG1)                                                       | Psmc5     | NP_112411.1    | 0 | 0  | 1 | 1  | 0 | 0  | 0  |
| fumarate hydratase 1                                                                | Fh1       | NP_058701.2    | 1 | 1  | 0 | 0  | 0 | 0  | 0  |
| FXFD domain-containing ion transport regulator 2 isoform a                          | Fxyd2     | NP_663769.1    | 1 | 2  | 0 | 0  | 0 | 0  | 0  |
| G protein pathway suppressor 1                                                      | Gps1      | NP_446421.2    | 0 | 0  | 0 | 0  | 2 | 2  | 0  |
| G1 to S phase transition 1                                                          | Gspt1     | NP_001003978.1 | 0 | 0  | 0 | 0  | 0 | 1  | 2  |
| G1 to S phase transition 2                                                          | Gspt2     | NP_001102789.1 | 0 | 0  | 0 | 0  | 0 | 1  | 2  |
| galactose mutarotase                                                                | Galm      | NP_001007705.1 | 0 | 0  | 0 | 0  | 0 | 2  | 5  |
| galectin 3                                                                          | Lgals3    | NP_114020.1    | 0 | 0  | 1 | 1  | 0 | 0  | 0  |
| GDP dissociation inhibitor 1                                                        | Gdi1      | NP_058784.2    | 0 | 0  | 0 | 0  | 0 | 4  | 7  |
| GDP dissociation inhibitor 2                                                        | Gdi2      | NP_058972.2    | 1 | 1  | 0 | 0  | 0 | 1  | 2  |
| gelsolin                                                                            | Gsn       | NP_001004080.1 | 1 | 1  | 1 | 1  | 2 | 7  | 10 |
| glucose phosphate isomerase                                                         | Gpi       | NP_997475.1    | 1 | 1  | 0 | 0  | 0 | 2  | 3  |
| glucose-6-phosphate dehydrogenase                                                   | G6pdx     | NP_058702.1    | 0 | 0  | 0 | 0  | 0 | 1  | 1  |
| glutamate dehydrogenase 1                                                           | Glud1     | NP_036702.1    | 4 | 4  | 0 | 0  | 0 | 0  | 0  |
| glutamate oxaloacetate transaminase 1, soluble                                      | Got1      | NP_036703.1    | 0 | 0  | 0 | 0  | 0 | 1  | 1  |
| glutamate receptor, ionotropic, delta 1                                             | Grid1     | NP_077354.1    | 0 | 0  | 0 | 0  | 1 | 1  | 0  |
| glutamyl-tRNA synthetase                                                            | Qars      | NP_001007625.1 | 0 | 0  | 0 | 0  | 3 | 0  | 0  |
| glutamyl-prolyl-tRNA synthetase                                                     | Eprs      | NP_001019409.1 | 0 | 0  | 0 | 0  | 2 | 2  | 0  |
| glutathione reductase                                                               | Gsr       | NP_446358.1    | 2 | 2  | 0 | 0  | 0 | 2  | 5  |
| glutathione S-transferase omega 2                                                   | Gsto2     | NP_001012071.1 | 0 | 0  | 0 | 0  | 0 | 1  | 2  |
| glutathione S-transferase, mu 2                                                     | Gstm2     | NP_803175.1    | 0 | 0  | 0 | 0  | 0 | 3  | 5  |
| glutathione S-transferase, mu 6-like                                                | Gstm6l    | NP_001099934.1 | 0 | 0  | 0 | 0  | 3 | 3  | 0  |
| glutathione S-transferase, pi                                                       | Gstp1     | NP_036709.1    | 1 | 1  | 1 | 1  | 0 | 3  | 5  |
| glyceraldehyde-3-phosphate dehydrogenase                                            | Gapdh     | NP_058704.1    | 3 | 4  | 2 | 2  | 5 | 10 | 4  |
| glyceraldehyde-3-phosphate dehydrogenase, spermatogenic                             | Gapdhs    | NP_076454.1    | 0 | 0  | 1 | 2  | 3 | 3  | 2  |
| glycoprotein m6a                                                                    | Gpm6a     | NP_835206.1    | 0 | 0  | 0 | 0  | 0 | 0  | 1  |
| GNAS (guanine nucleotide binding protein, alpha stimulating) complex locus XLalphas | Gnas      | NP_068617.4    | 1 | 1  | 0 | 0  | 0 | 0  | 0  |
| golgi apparatus protein 1                                                           | Glg1      | NP_058907.1    | 0 | 0  | 1 | 1  | 0 | 0  | 0  |
| golgi autoantigen, golgin subfamily b, macrogolgin 1                                | Golgb1    | NP_620240.1    | 1 | 1  | 1 | 1  | 0 | 0  | 0  |
| guanine nucleotide binding protein (G protein), alpha inhibiting 3                  | Gnai3     | NP_037238.1    | 0 | 0  | 1 | 1  | 0 | 0  | 0  |
| guanine nucleotide binding protein, alpha inhibiting 2                              | Gnai2     | NP_112297.1    | 1 | 1  | 1 | 1  | 0 | 0  | 0  |
| guanine nucleotide binding protein, beta polypeptide 2-like 1                       | Gnb2l1    | NP_570090.1    | 0 | 0  | 0 | 0  | 2 | 3  | 1  |
| guanine nucleotide-binding protein, beta 2                                          | Gnb2      | NP_112299.1    | 1 | 1  | 2 | 3  | 0 | 0  | 0  |
| guanine nucleotide-binding protein, beta 1 subunit                                  | Gnb1      | NP_112249.2    | 0 | 0  | 2 | 2  | 0 | 0  | 0  |
| H2A histone family, member J                                                        | H2afj     | NP_001103080.1 | 2 | 2  | 0 | 0  | 2 | 2  | 0  |
| H2A histone family, member V                                                        | H2afv     | NP_001099489.1 | 1 | 1  | 0 | 0  | 0 | 0  | 0  |
| H3 histone, family 3B                                                               | H3f3b     | NP_446437.1    | 1 | 1  | 0 | 0  | 0 | 0  | 0  |
| heat shock 105kDa/110kDa protein 1                                                  | Hsph1     | NP_001011901.1 | 0 | 0  | 1 | 1  | 0 | 9  | 14 |
| heat shock 70kD protein 1B                                                          | Hspa1b    | NP_997669.1    | 2 | 2  | 2 | 2  | 0 | 9  | 14 |
| heat shock 70kD protein 1-like                                                      | Hspa1l    | NP_997711.1    | 4 | 9  | 5 | 14 | 6 | 11 | 7  |
| heat shock protein 1                                                                | Hspb1     | NP_114176.3    | 0 | 0  | 1 | 3  | 3 | 6  | 0  |
| heat shock protein 1 (chaperonin)                                                   | Hspd1     | NP_071565.1    | 7 | 10 | 0 | 0  | 1 | 2  | 1  |
| heat shock protein 2                                                                | Hspa2     | NP_068635.1    | 2 | 2  | 2 | 2  | 3 | 4  | 15 |
| heat shock protein 4                                                                | Hspa4     | NP_705893.1    | 0 | 0  | 0 | 0  | 0 | 8  | 11 |
| heat shock protein 5                                                                | Hspa5     | NP_037215.1    | 3 | 4  | 4 | 6  | 0 | 0  | 0  |
| heat shock protein 8                                                                | Hspa8     | NP_077327.1    | 2 | 2  | 4 | 4  | 1 | 1  | 11 |
| heat shock protein 9                                                                | Hspa9     | NP_001094128.1 | 3 | 3  | 1 | 1  | 0 | 0  | 0  |
| heat shock protein 90, alpha (cytosolic), class A member 1                          | Hsp90aa1  | NP_786937.1    | 1 | 1  | 3 | 3  | 0 | 6  | 14 |
| heat shock protein 90kDa alpha (cytosolic), class B member 1                        | Hsp90ab1  | NP_001004082.3 | 4 | 6  | 3 | 4  | 2 | 22 | 40 |
| heat-responsive protein 12                                                          | Hrsp12    | NP_113902.1    | 0 | 0  | 0 | 0  | 0 | 1  | 1  |
| hemoglobin alpha 1 chain                                                            | Hba-a2    | NP_037228.1    | 0 | 0  | 0 | 0  | 0 | 2  | 2  |
| hemoglobin beta chain complex                                                       | Hbb       | NP_150237.1    | 0 | 0  | 0 | 0  | 0 | 1  | 2  |
| heterogeneous nuclear ribonucleoprotein A/B                                         | Hnmpab    | NP_112620.2    | 0 | 0  | 0 | 0  | 1 | 3  | 1  |
| heterogeneous nuclear ribonucleoprotein A1                                          | Hnmpa1    | NP_058944.1    | 0 | 0  | 0 | 0  | 1 | 2  | 0  |
| heterogeneous nuclear ribonucleoprotein A2/B1                                       | Hnmpa2b1  | NP_001098083.1 | 1 | 1  | 0 | 0  | 3 | 3  | 0  |
| heterogeneous nuclear ribonucleoprotein K                                           | Hnmpk     | NP_476482.1    | 1 | 1  | 1 | 1  | 3 | 3  | 1  |
| heterogeneous nuclear ribonucleoprotein U                                           | Hnmpu     | NP_476480.2    | 1 | 1  | 0 | 0  | 2 | 2  | 0  |
| hexokinase 1                                                                        | Hk1       | NP_036866.1    | 5 | 7  | 1 | 1  | 0 | 0  | 0  |
| hexosaminidase B                                                                    | Hexb      | NP_001011946.1 | 1 | 1  | 0 | 0  | 0 | 0  | 0  |
| hexose-6-phosphate dehydrogenase (glucose 1-dehydrogenase)                          | H6pd      | NP_001100168.1 | 0 | 0  | 2 | 4  | 0 | 1  | 2  |
| high density lipoprotein binding protein (vigilin)                                  | Hdlbp     | NP_742036.2    | 0 | 0  | 0 | 0  | 1 | 1  | 1  |
| high mobility group box 1                                                           | Hmgb1     | NP_037095.1    | 1 | 1  | 0 | 0  | 0 | 0  | 0  |
| histone cluster 1, H1d                                                              | Hist1h1d  | NP_579819.1    | 1 | 3  | 1 | 1  | 0 | 0  | 0  |
| histone cluster 1, H1t                                                              | Hist1h1t  | NP_036711.1    | 1 | 5  | 0 | 0  | 0 | 0  | 0  |
| histone cluster 1, H2bl                                                             | Hist1h2bl | NP_072173.1    | 0 | 0  | 1 | 2  | 0 | 0  | 0  |
| histone cluster 1, H4b                                                              | Hist1h4b  | NP_073177.1    | 3 | 5  | 2 | 3  | 0 | 0  | 0  |
| histone cluster 3, H2ba                                                             | Hist3h2ba | NP_001104597.1 | 1 | 3  | 2 | 3  | 0 | 0  | 0  |

|                                                                                                                                    |            |                |   |   |   |    |   |    |    |    |
|------------------------------------------------------------------------------------------------------------------------------------|------------|----------------|---|---|---|----|---|----|----|----|
| hydroxysteroid (17-beta) dehydrogenase 10                                                                                          | Hsd17b10   | NP_113870.1    | 1 | 1 | 0 | 0  | 0 | 0  | 0  | 0  |
| hypothetical protein LOC290818                                                                                                     | RGD1562638 | NP_001094414.1 | 1 | 1 | 0 | 0  | 0 | 0  | 0  | 0  |
| hypothetical protein LOC296179                                                                                                     | RGD1306816 | NP_001099985.1 | 0 | 0 | 0 | 0  | 0 | 0  | 1  | 2  |
| hypothetical protein LOC301742                                                                                                     | RGD1566215 | NP_001100399.1 | 0 | 0 | 0 | 0  | 1 | 1  | 0  | 0  |
| hypothetical protein LOC361118                                                                                                     | RGD1309676 | NP_001014162.1 | 1 | 1 | 0 | 0  | 0 | 0  | 0  | 0  |
| hypothetical protein LOC362107                                                                                                     | RGD1305081 | NP_001102048.1 | 1 | 1 | 0 | 0  | 0 | 0  | 0  | 0  |
| hypothetical protein LOC362643                                                                                                     | RGD1310427 | NP_001102160.1 | 1 | 2 | 1 | 2  | 0 | 0  | 0  | 0  |
| hypothetical protein LOC365554                                                                                                     | RGD1560350 | NP_001102401.1 | 0 | 0 | 0 | 0  | 1 | 3  | 0  | 0  |
| hypothetical protein LOC498129                                                                                                     | RGD1563425 | NP_001102529.1 | 0 | 0 | 1 | 1  | 0 | 0  | 0  | 0  |
| hypothetical protein LOC499782                                                                                                     | LOC499782  | NP_001102668.1 | 1 | 1 | 0 | 0  | 1 | 1  | 0  | 0  |
| hypothetical protein LOC500991                                                                                                     | LOC500991  | NP_001020226.1 | 1 | 1 | 1 | 2  | 0 | 0  | 0  | 0  |
| hypothetical protein LOC690660                                                                                                     | LOC690660  | NP_001103077.1 | 1 | 1 | 0 | 0  | 0 | 0  | 1  | 1  |
| hypothetical protein LOC691496                                                                                                     | LOC691496  | NP_001103112.1 | 0 | 0 | 1 | 1  | 0 | 0  | 0  | 0  |
| hypoxanthine guanine phosphoribosyl transferase 1                                                                                  | Hprt1      | NP_036715.1    | 0 | 0 | 0 | 0  | 0 | 0  | 1  | 1  |
| inner membrane protein, mitochondrial                                                                                              | Immt       | NP_001030100.1 | 3 | 3 | 0 | 0  | 0 | 0  | 0  | 0  |
| Inositol (myo)-1(or 4)-monophosphatase 1                                                                                           | Impa1      | NP_114446.1    | 0 | 0 | 0 | 0  | 0 | 0  | 2  | 4  |
| integrin beta 1                                                                                                                    | Itgb1      | NP_058718.2    | 4 | 4 | 5 | 6  | 0 | 0  | 0  | 0  |
| isocitrate dehydrogenase 1 (NADP+), soluble                                                                                        | Idh1       | NP_113698.1    | 1 | 1 | 0 | 0  | 0 | 0  | 2  | 3  |
| isocitrate dehydrogenase 2 (NADP+), mitochondrial                                                                                  | Idh2       | NP_001014183.1 | 3 | 3 | 0 | 0  | 0 | 0  | 1  | 2  |
| isovaleryl Coenzyme A dehydrogenase                                                                                                | Ivd        | NP_036724.1    | 1 | 1 | 0 | 0  | 0 | 0  | 0  | 0  |
| JTV1                                                                                                                               | Jtv1       | NP_001032425.1 | 0 | 0 | 0 | 0  | 1 | 1  | 0  | 0  |
| junction plakoglobin                                                                                                               | Jup        | NP_112309.2    | 0 | 0 | 1 | 1  | 0 | 0  | 0  | 0  |
| junctophilin 3                                                                                                                     | Jph3       | NP_001100907.1 | 0 | 0 | 0 | 0  | 0 | 0  | 1  | 1  |
| karyopherin (importin) beta 1                                                                                                      | Kpnb1      | NP_058759.1    | 0 | 0 | 0 | 0  | 0 | 0  | 2  | 3  |
| keratin 10                                                                                                                         | Krt10      | NP_001008804.1 | 1 | 2 | 3 | 5  | 1 | 1  | 6  | 11 |
| keratin 18                                                                                                                         | Krt18      | NP_446428.1    | 6 | 8 | 6 | 7  | 3 | 3  | 1  | 1  |
| keratin 19                                                                                                                         | Krt19      | NP_955792.1    | 0 | 0 | 7 | 11 | 4 | 5  | 2  | 3  |
| keratin 7                                                                                                                          | Krt7       | NP_001041335.1 | 0 | 0 | 1 | 1  | 1 | 1  | 0  | 0  |
| keratin 8                                                                                                                          | Krt8       | NP_955402.1    | 4 | 5 | 3 | 5  | 6 | 6  | 3  | 3  |
| kinesin 13B                                                                                                                        | kif13B     | NP_998791.1    | 0 | 0 | 0 | 0  | 0 | 0  | 1  | 2  |
| kinesin family member 2C isoform 1                                                                                                 | Kif2c      | NP_001078838.1 | 1 | 1 | 0 | 0  | 0 | 0  | 0  | 0  |
| kinesin family member 5C                                                                                                           | Kif5c      | NP_001101200.1 | 1 | 1 | 0 | 0  | 1 | 1  | 0  | 0  |
| L-3-hydroxyacyl-Coenzyme A dehydrogenase                                                                                           | Hadh       | NP_476534.1    | 1 | 1 | 0 | 0  | 0 | 0  | 0  | 0  |
| lactate dehydrogenase A                                                                                                            | Ldha       | NP_058721.1    | 3 | 6 | 6 | 10 | 8 | 16 | 9  | 13 |
| lactate dehydrogenase B                                                                                                            | Ldhb       | NP_036727.1    | 0 | 0 | 1 | 1  | 0 | 0  | 2  | 3  |
| lamin A isoform C2                                                                                                                 | Lmna       | NP_001002016.1 | 3 | 5 | 0 | 0  | 0 | 0  | 0  | 0  |
| lamin B1                                                                                                                           | Lmnb1      | NP_446357.1    | 1 | 2 | 0 | 0  | 0 | 0  | 0  | 0  |
| laminin receptor 1                                                                                                                 | Rpsa       | NP_058834.1    | 1 | 2 | 1 | 1  | 1 | 1  | 2  | 2  |
| laminin, beta 2                                                                                                                    | Lamb2      | NP_037106.1    | 2 | 2 | 1 | 1  | 1 | 2  | 0  | 0  |
| lectin, mannose-binding, 1                                                                                                         | Lman1      | NP_446338.1    | 1 | 1 | 0 | 0  | 0 | 0  | 0  | 0  |
| leucine rich repeat (in FLII) interacting protein 1                                                                                | Lrrfp1     | NP_001014291.1 | 0 | 0 | 0 | 0  | 0 | 0  | 1  | 1  |
| leucine zipper-EF-hand containing transmembrane protein 1                                                                          | Letm1      | NP_001005884.1 | 1 | 1 | 0 | 0  | 0 | 0  | 0  | 0  |
| leucyl/cystinyl aminopeptidase isoform 1                                                                                           | Lnpep      | NP_001106874.1 | 0 | 0 | 3 | 3  | 0 | 0  | 0  | 0  |
| leukotriene A4 hydrolase                                                                                                           | Lta4h      | NP_001025202.1 | 0 | 0 | 0 | 0  | 0 | 0  | 8  | 12 |
| leukotriene B4 12-hydroxydehydrogenase                                                                                             | Ltb4dh     | NP_620218.1    | 0 | 0 | 0 | 0  | 2 | 2  | 4  | 4  |
| LIM domain only 7                                                                                                                  | Lmo7       | NP_001001515.1 | 1 | 3 | 1 | 1  | 1 | 1  | 0  | 0  |
| lin-7 homolog C                                                                                                                    | Lin7c      | NP_068623.1    | 1 | 1 | 0 | 0  | 0 | 0  | 0  | 0  |
| liver glycogen phosphorylase                                                                                                       | Pygl       | NP_071604.1    | 0 | 0 | 0 | 0  | 1 | 1  | 8  | 8  |
| LPS-responsive beige-like anchor LUC7-like 2                                                                                       | Lrba       | NP_001102025.1 | 1 | 1 | 0 | 0  | 0 | 0  | 14 | 30 |
| Luc7-like 2                                                                                                                        | Luc7l2     | NP_001101323.1 | 0 | 0 | 0 | 0  | 1 | 1  | 0  | 0  |
| lymphocyte cytosolic protein 1                                                                                                     | Lcp1       | NP_001012044.1 | 0 | 0 | 0 | 0  | 1 | 1  | 4  | 6  |
| lysosomal trafficking regulator                                                                                                    | Lyst       | NP_445970.1    | 0 | 0 | 0 | 0  | 0 | 0  | 1  | 2  |
| lysosomal-associated membrane protein 1                                                                                            | Lamp1      | NP_036989.1    | 2 | 4 | 3 | 4  | 1 | 2  | 1  | 1  |
| macrophage migration inhibitory factor                                                                                             | Mif        | NP_112313.1    | 0 | 0 | 0 | 0  | 0 | 0  | 1  | 2  |
| magnesium-dependent phosphatase 1                                                                                                  | Mdp-1      | NP_001099509.1 | 0 | 0 | 0 | 0  | 0 | 0  | 1  | 1  |
| major vault protein                                                                                                                | Mvp        | NP_073206.2    | 0 | 0 | 0 | 0  | 5 | 5  | 0  | 0  |
| MAL2 proteolipid protein                                                                                                           | Mal2       | NP_942081.2    | 0 | 0 | 1 | 2  | 0 | 0  | 0  | 0  |
| malate dehydrogenase 1, NAD (soluble)                                                                                              | Mdh1       | NP_150238.1    | 0 | 0 | 1 | 1  | 0 | 0  | 3  | 5  |
| malate dehydrogenase, mitochondrial                                                                                                | Mdh2       | NP_112413.2    | 1 | 1 | 0 | 0  | 0 | 0  | 0  | 0  |
| malic enzyme 1                                                                                                                     | Me1        | NP_036732.2    | 0 | 0 | 0 | 0  | 2 | 3  | 6  | 7  |
| mannosidase, beta A, lysosomal                                                                                                     | Manba      | NP_001026825.1 | 1 | 1 | 0 | 0  | 0 | 0  | 0  | 0  |
| matrin 3                                                                                                                           | Matr3      | NP_062022.2    | 1 | 1 | 0 | 0  | 0 | 0  | 0  | 0  |
| membrane bound C2 domain containing protein                                                                                        | Mbc2       | NP_058945.2    | 1 | 1 | 1 | 1  | 0 | 0  | 0  | 0  |
| methylentetrahydrofolate dehydrogenase (NADP+ dependent), methenyltetrahydrofolate cyclohydrolase, formyltetrahydrofolate synthase | Mthfd1     | NP_071953.1    | 0 | 0 | 0 | 0  | 1 | 1  | 0  | 0  |
| microfibrillar-associated protein 2                                                                                                | Mfap2      | NP_001101459.1 | 0 | 0 | 1 | 1  | 0 | 0  | 0  | 0  |
| microtubule-associated protein 2                                                                                                   | Mtap2      | NP_037198.1    | 0 | 0 | 0 | 0  | 1 | 1  | 0  | 0  |
| microtubule-associated protein 4                                                                                                   | Mtap4      | NP_001019449.1 | 0 | 0 | 0 | 0  | 1 | 1  | 0  | 0  |
| mitochondrial ATP synthase, O subunit                                                                                              | Atp5o      | NP_620238.1    | 1 | 1 | 1 | 1  | 0 | 0  | 0  | 0  |
| mitochondrial trifunctional protein, alpha subunit                                                                                 | Hadha      | NP_570839.2    | 2 | 2 | 0 | 0  | 0 | 0  | 0  | 0  |

|                                                                                                                                                                                          |            |                |    |    |    |    |    |    |    |    |
|------------------------------------------------------------------------------------------------------------------------------------------------------------------------------------------|------------|----------------|----|----|----|----|----|----|----|----|
| mitochondrial trifunctional protein, beta subunit                                                                                                                                        | Hadhb      | NP_598302.1    | 1  | 1  | 0  | 0  | 0  | 0  | 0  | 0  |
| moesin                                                                                                                                                                                   | Msn        | NP_110490.1    | 0  | 0  | 0  | 0  | 0  | 0  | 1  | 2  |
| Munc13-4 protein                                                                                                                                                                         | Unc13d     | NP_620199.1    | 0  | 0  | 1  | 1  | 0  | 0  | 0  | 0  |
| myo-inositol 1-phosphate synthase A1                                                                                                                                                     | lsyna1     | NP_001013902.1 | 0  | 0  | 0  | 0  | 2  | 2  | 7  | 15 |
| myosin light chain, regulatory B                                                                                                                                                         | Mrfcb      | NP_059039.1    | 0  | 0  | 1  | 1  | 0  | 0  | 0  | 0  |
| myosin, heavy polypeptide 10, non-muscle                                                                                                                                                 | Myh10      | NP_113708.1    | 19 | 25 | 14 | 16 | 13 | 15 | 12 | 17 |
| myosin, heavy polypeptide 9                                                                                                                                                              | Myh9       | NP_037326.1    | 13 | 19 | 9  | 10 | 6  | 6  | 8  | 13 |
| myosin, light polypeptide 6, alkali, smooth muscle and non-muscle-like                                                                                                                   | Myi6l      | NP_001094453.1 | 2  | 2  | 2  | 2  | 1  | 2  | 0  | 0  |
| myxovirus (influenza virus) resistance 2                                                                                                                                                 | Mx2        | NP_599177.2    | 2  | 3  | 0  | 0  | 1  | 1  | 1  | 1  |
| Na+/K+ -ATPase alpha 3 subunit                                                                                                                                                           | Atp1a3     | NP_036638.1    | 5  | 10 | 8  | 19 | 2  | 2  | 0  | 0  |
| N-acetylneuraminic acid synthase                                                                                                                                                         | Nans       | NP_001100125.2 | 0  | 0  | 0  | 0  | 0  | 0  | 1  | 2  |
| NADH dehydrogenase (ubiquinone) 1 alpha subcomplex, 12                                                                                                                                   | Ndufa12    | NP_001100251.2 | 1  | 1  | 0  | 0  | 0  | 0  | 0  | 0  |
| NADH dehydrogenase (ubiquinone) Fe-S protein 2                                                                                                                                           | Ndufs2     | NP_001011907.1 | 2  | 3  | 1  | 1  | 0  | 0  | 0  | 0  |
| NADH dehydrogenase (ubiquinone) Fe-S protein 4                                                                                                                                           | Ndufs4     | NP_001020317.1 | 1  | 1  | 0  | 0  | 0  | 0  | 0  | 0  |
| nascent-polypeptide-associated complex alpha polypeptide                                                                                                                                 | Naca       | NP_001099409.1 | 0  | 0  | 0  | 0  | 0  | 0  | 1  | 1  |
| N-ethylmaleimide sensitive fusion protein attachment protein alpha                                                                                                                       | Napa       | NP_542152.1    | 0  | 0  | 1  | 1  | 0  | 0  | 0  | 0  |
| niban protein                                                                                                                                                                            | Niban      | NP_071578.1    | 0  | 0  | 0  | 0  | 0  | 0  | 1  | 1  |
| nicotinamide nucleotide transhydrogenase                                                                                                                                                 | Nnt        | NP_001013175.1 | 1  | 2  | 0  | 0  | 0  | 0  | 0  | 0  |
| nitrilase 1 isoform b                                                                                                                                                                    | Nit1       | NP_001076049.1 | 0  | 0  | 0  | 0  | 0  | 0  | 1  | 1  |
| N-myc downstream regulated gene 1                                                                                                                                                        | Ndrp1      | NP_001011991.1 | 0  | 0  | 1  | 1  | 0  | 0  | 0  | 0  |
| non-metastatic cells 2, protein (NM23B) expressed in                                                                                                                                     | Nme2       | NP_114021.2    | 0  | 0  | 0  | 0  | 0  | 0  | 2  | 2  |
| NonO/p54nrb homolog                                                                                                                                                                      | Sfpq       | NP_001020442.1 | 1  | 1  | 0  | 0  | 0  | 0  | 0  | 0  |
| nuclear protein in testis                                                                                                                                                                | Nut        | NP_001102427.1 | 1  | 1  | 0  | 0  | 0  | 0  | 0  | 0  |
| nucleolin                                                                                                                                                                                | Ncl        | NP_036881.2    | 0  | 0  | 0  | 0  | 0  | 0  | 1  | 1  |
| nucleoporin 205                                                                                                                                                                          | Nup205     | NP_001102090.1 | 0  | 0  | 0  | 0  | 0  | 0  | 1  | 1  |
| nudix-type motif 4                                                                                                                                                                       | Nudt4      | NP_446050.1    | 0  | 0  | 0  | 0  | 0  | 0  | 1  | 2  |
| NUF2, NDC80 kinetochore complex component, homolog                                                                                                                                       | Nuf2       | NP_001012028.1 | 1  | 1  | 1  | 1  | 0  | 0  | 0  | 0  |
| Parkinson disease protein 7                                                                                                                                                              | Park7      | NP_476484.1    | 0  | 0  | 0  | 0  | 0  | 0  | 1  | 1  |
| peptidylprolyl isomerase A                                                                                                                                                               | Ppia       | NP_058797.1    | 3  | 3  | 1  | 2  | 1  | 2  | 6  | 16 |
| periplakin                                                                                                                                                                               | Ppl        | NP_001100446.1 | 7  | 9  | 7  | 8  | 3  | 3  | 13 | 16 |
| peroxiredoxin 1                                                                                                                                                                          | Prdx1      | NP_476455.1    | 1  | 1  | 1  | 1  | 0  | 0  | 2  | 2  |
| peroxiredoxin 3                                                                                                                                                                          | Prdx3      | NP_071985.1    | 1  | 1  | 0  | 0  | 0  | 0  | 0  | 0  |
| peroxiredoxin 5 precursor                                                                                                                                                                | Prdx5      | NP_446062.1    | 0  | 0  | 0  | 0  | 0  | 0  | 4  | 5  |
| peroxiredoxin 6                                                                                                                                                                          | Prdx6      | NP_446028.1    | 0  | 0  | 0  | 0  | 0  | 0  | 2  | 2  |
| PHD finger protein 10                                                                                                                                                                    | Phf10      | NP_001019918.1 | 1  | 1  | 0  | 0  | 0  | 0  | 0  | 0  |
| phosphatidate cytidylyltransferase 2                                                                                                                                                     | Cds2       | NP_446095.1    | 1  | 1  | 1  | 2  | 0  | 0  | 0  | 0  |
| phosphatidic acid phosphatase type 2c                                                                                                                                                    | Ppap2c     | NP_640345.1    | 0  | 0  | 1  | 1  | 0  | 0  | 0  | 0  |
| phosphatidylethanolamine binding protein                                                                                                                                                 | Pebp1      | NP_058932.1    | 1  | 1  | 1  | 1  | 0  | 0  | 3  | 4  |
| phosphodiesterase 1A                                                                                                                                                                     | Pde1a      | NP_110498.1    | 0  | 0  | 0  | 0  | 0  | 0  | 1  | 1  |
| phosphofructokinase, liver, B-type                                                                                                                                                       | Pfkl       | NP_037322.1    | 0  | 0  | 0  | 0  | 0  | 0  | 1  | 1  |
| phosphofructokinase, muscle                                                                                                                                                              | Pfkm       | NP_113903.1    | 0  | 0  | 0  | 0  | 3  | 3  | 1  | 1  |
| phosphoglucomutase 1                                                                                                                                                                     | Pgm1       | NP_058729.2    | 0  | 0  | 0  | 0  | 0  | 0  | 7  | 9  |
| phosphoglucomutase 2                                                                                                                                                                     | Pgm2       | NP_001099477.1 | 0  | 0  | 0  | 0  | 0  | 0  | 1  | 1  |
| phosphoglucomutase 3                                                                                                                                                                     | Pgm3       | NP_001102242.1 | 0  | 0  | 0  | 0  | 0  | 0  | 1  | 1  |
| phosphoglycerate kinase 1                                                                                                                                                                | Pgk1       | NP_445743.2    | 0  | 0  | 0  | 0  | 0  | 0  | 5  | 9  |
| phosphoglycerate mutase 1                                                                                                                                                                | Pgam1      | NP_445742.1    | 0  | 0  | 0  | 0  | 0  | 0  | 1  | 2  |
| phosphoribosylformylglycinamide synthase (FGAR amidotransferase)                                                                                                                         | Pfas       | NP_001099261.1 | 0  | 0  | 0  | 0  | 0  | 0  | 1  | 2  |
| phosphoserine aminotransferase 1                                                                                                                                                         | Psat1      | NP_942033.2    | 0  | 0  | 0  | 0  | 0  | 0  | 3  | 8  |
| plasma glutamate carboxypeptidase                                                                                                                                                        | Pgcp       | NP_113828.1    | 1  | 2  | 0  | 0  | 0  | 0  | 0  | 0  |
| plastin 1 (I isoform)                                                                                                                                                                    | Pls1       | NP_001101648.1 | 0  | 0  | 0  | 0  | 0  | 0  | 5  | 6  |
| plectin 1                                                                                                                                                                                | Plec1      | NP_071796.1    | 13 | 14 | 4  | 5  | 5  | 7  | 13 | 18 |
| plexin B2                                                                                                                                                                                | Plxnb2     | NP_001101576.1 | 0  | 0  | 2  | 2  | 0  | 0  | 0  | 0  |
| poly(A)-specific ribonuclease (PARN)-like domain containing 1                                                                                                                            | Pnldc1     | NP_001020895.1 | 0  | 0  | 0  | 0  | 0  | 0  | 1  | 1  |
| polymerase I and transcript release factor                                                                                                                                               | Ptrf       | NP_001099311.1 | 1  | 1  | 0  | 0  | 0  | 0  | 0  | 0  |
| polypyrimidine tract binding protein 1 isoform b                                                                                                                                         | Ptbp1      | NP_071961.1    | 1  | 1  | 0  | 0  | 0  | 0  | 0  | 0  |
| post-GPI attachment to proteins 1                                                                                                                                                        | Pgap1      | NP_973719.1    | 0  | 0  | 1  | 2  | 0  | 0  | 0  | 0  |
| PREDICTED: hypothetical protein                                                                                                                                                          | LOC688274  | XP_001081727.1 | 0  | 0  | 1  | 2  | 0  | 0  | 1  | 1  |
| PREDICTED: similar to 3-oxoacid CoA transferase 1 isoform 1                                                                                                                              | LOC678860  | XP_001053611.1 | 3  | 3  | 0  | 0  | 0  | 0  | 0  | 0  |
| PREDICTED: similar to 40S ribosomal protein S16                                                                                                                                          | RGD1559743 | XP_001077121.1 | 0  | 0  | 0  | 0  | 1  | 1  | 0  | 0  |
| PREDICTED: similar to 40S ribosomal protein S17                                                                                                                                          | RGD1559955 | XP_001071140.1 | 0  | 0  | 0  | 0  | 2  | 2  | 0  | 0  |
| PREDICTED: similar to 60 kDa heat shock protein, mitochondrial precursor (Hsp60) (60 kDa chaperonin) (CPN60) (Heat shock protein 60) (HSP-60) (Mitochondrial matrix protein P1) (HSP-65) | LOC684747  | XP_001071820.1 | 1  | 1  | 0  | 0  | 1  | 1  | 0  | 0  |
| PREDICTED: similar to 60S ribosomal protein L7                                                                                                                                           | RGD1564645 | XP_001064059.1 | 0  | 0  | 0  | 0  | 1  | 1  | 0  | 0  |
| PREDICTED: similar to 60S ribosomal protein L7a                                                                                                                                          | RGD1559149 | XP_225356.3    | 0  | 0  | 0  | 0  | 1  | 1  | 0  | 0  |

|                                                                                                                                                                                                                                                                        |            |                |   |    |   |   |   |   |   |    |
|------------------------------------------------------------------------------------------------------------------------------------------------------------------------------------------------------------------------------------------------------------------------|------------|----------------|---|----|---|---|---|---|---|----|
| PREDICTED: similar to AHNAK nucleoprotein isoform 1 isoform 4                                                                                                                                                                                                          | Ahnak      | XP_001078113.1 | 9 | 14 | 5 | 8 | 4 | 7 | 2 | 2  |
| PREDICTED: similar to alanyl-tRNA synthetase                                                                                                                                                                                                                           | Aars       | XP_001077503.1 | 0 | 0  | 0 | 0 | 0 | 0 | 1 | 1  |
| PREDICTED: similar to Alpha-1,3-mannosyltransferase ALG2 (GDP-Man:Man(1)GlcNAc(2)-PP-dolichol mannosyltransferase)                                                                                                                                                     | Alg2       | XP_001055088.1 | 1 | 1  | 1 | 1 | 0 | 0 | 0 | 0  |
| PREDICTED: similar to AP-1 complex subunit gamma-1 (Adapter-related protein complex 1 gamma-1 subunit) (Gamma-adaptin) (Adaptor protein complex AP-1 gamma-1 subunit) (Golgi adaptor HA1/AP1 adaptin subunit gamma-1) (Clathrin assembly protein complex 1 gamma-1 ... | Ap1g1      | XP_001075367.1 | 0 | 0  | 0 | 0 | 0 | 0 | 1 | 2  |
| PREDICTED: similar to Beta-2-syntrophin (59 kDa dystrophin-associated protein A1, basic component 2) (Syntrophin 3) (SNT3) (Syntrophin-like) (SNTL) isoform 1                                                                                                          | LOC689421  | XP_001071003.1 | 1 | 1  | 0 | 0 | 0 | 0 | 0 | 0  |
| PREDICTED: similar to Calcium-binding mitochondrial carrier protein Aralar2 (Mitochondrial aspartate glutamate carrier 2) (Solute carrier family 25 member 13) (Citrin)                                                                                                | RGD1565889 | XP_001054092.1 | 1 | 1  | 0 | 0 | 0 | 0 | 0 | 0  |
| PREDICTED: similar to cell adhesion molecule with homology to L1CAM                                                                                                                                                                                                    | Chl1       | XP_001077843.1 | 1 | 1  | 0 | 0 | 0 | 0 | 0 | 0  |
| PREDICTED: similar to centromere autoantigen H                                                                                                                                                                                                                         | LOC684611  | XP_001071235.1 | 1 | 1  | 0 | 0 | 1 | 1 | 0 | 0  |
| PREDICTED: similar to Cingulin                                                                                                                                                                                                                                         | Cgn        | XP_001059265.1 | 1 | 1  | 0 | 0 | 0 | 0 | 0 | 0  |
| PREDICTED: similar to coiled-coil domain containing 13                                                                                                                                                                                                                 | LOC687047  | XP_001078641.1 | 0 | 0  | 0 | 0 | 1 | 1 | 0 | 0  |
| PREDICTED: similar to coiled-coil domain containing 22                                                                                                                                                                                                                 | Ccdc22     | XP_001060019.1 | 0 | 0  | 0 | 0 | 1 | 1 | 0 | 0  |
| PREDICTED: similar to Collagen alpha-1(XVIII) chain precursor                                                                                                                                                                                                          | Col18a1    | XP_001079576.1 | 0 | 0  | 0 | 0 | 1 | 1 | 0 | 0  |
| PREDICTED: similar to Contactin-associated protein-like 3 precursor (Cell recognition molecule Caspr3)                                                                                                                                                                 | RGD1563615 | XP_001064593.1 | 0 | 0  | 0 | 0 | 1 | 1 | 0 | 0  |
| PREDICTED: similar to DNA polymerase alpha catalytic subunit                                                                                                                                                                                                           | Pola1      | XP_001064735.1 | 0 | 0  | 0 | 0 | 0 | 0 | 1 | 1  |
| PREDICTED: similar to Exocyst complex component 4 (Exocyst complex component Sec8) (rSec8) isoform 1                                                                                                                                                                   | Exoc4      | XP_001063828.1 | 1 | 1  | 1 | 2 | 0 | 0 | 0 | 0  |
| PREDICTED: similar to F35D11.11d                                                                                                                                                                                                                                       | RGD1308523 | XP_001070834.1 | 1 | 1  | 0 | 0 | 0 | 0 | 0 | 0  |
| PREDICTED: similar to family with sequence similarity 98, member B                                                                                                                                                                                                     | RGD1560464 | XP_001070294.1 | 0 | 0  | 0 | 0 | 1 | 1 | 0 | 0  |
| PREDICTED: similar to Filamin-A (Alpha-filamin) (Filamin-1) (Endothelial actin-binding protein) (Actin-binding protein 280) (ABP-280) (Nonmuscle filamin)                                                                                                              | Flna       | XP_238167.4    | 2 | 3  | 2 | 2 | 2 | 2 | 7 | 11 |
| PREDICTED: similar to Fras1 related extracellular matrix protein 2                                                                                                                                                                                                     | Frem2      | XP_001057556.1 | 0 | 0  | 2 | 3 | 1 | 1 | 0 | 0  |
| PREDICTED: similar to Galectin-5 (RL-18)                                                                                                                                                                                                                               | LOC682182  | XP_001060304.1 | 0 | 0  | 0 | 0 | 0 | 0 | 1 | 2  |
| PREDICTED: similar to GCN1 general control of amino-acid synthesis 1-like 1                                                                                                                                                                                            | Gcn11      | XP_001080241.1 | 0 | 0  | 1 | 1 | 0 | 0 | 1 | 1  |
| PREDICTED: similar to glucan (1,4-alpha-), branching enzyme 1                                                                                                                                                                                                          | Gbe1       | XP_001064453.1 | 0 | 0  | 0 | 0 | 0 | 0 | 1 | 1  |
| PREDICTED: similar to glyceraldehyde-3-phosphate dehydrogenase                                                                                                                                                                                                         | RGD1565368 | XP_001065101.1 | 1 | 1  | 0 | 0 | 1 | 2 | 1 | 1  |
| PREDICTED: similar to Glycolipid transfer protein (GLTP)                                                                                                                                                                                                               | Gltp       | XP_001080376.1 | 0 | 0  | 0 | 0 | 0 | 0 | 1 | 1  |
| PREDICTED: similar to glycyl-tRNA synthetase                                                                                                                                                                                                                           | Gars       | XP_216152.4    | 0 | 0  | 0 | 0 | 0 | 0 | 3 | 5  |
| PREDICTED: similar to heterogeneous nuclear ribonucleoprotein L                                                                                                                                                                                                        | Hnrpl      | XP_001074287.1 | 0 | 0  | 0 | 0 | 1 | 2 | 0 | 0  |
| PREDICTED: similar to Hook-related protein 1                                                                                                                                                                                                                           | RGD1306694 | XP_001065246.1 | 0 | 0  | 0 | 0 | 0 | 0 | 1 | 2  |
| PREDICTED: similar to Integrin alpha-2 precursor (Platelet membrane glycoprotein Ia) (GPIa) (Collagen receptor) (VLA-2 alpha chain) (CD49b antigen)                                                                                                                    | Itga2      | XP_001075558.1 | 0 | 0  | 1 | 1 | 0 | 0 | 0 | 0  |
| PREDICTED: similar to IQ motif and WD repeats 1 isoform a                                                                                                                                                                                                              | RGD1561961 | XP_001071288.1 | 0 | 0  | 0 | 0 | 0 | 0 | 1 | 1  |
| PREDICTED: similar to keratin Kb40                                                                                                                                                                                                                                     | Kb40       | XP_001067238.1 | 0 | 0  | 1 | 2 | 0 | 0 | 1 | 1  |
| PREDICTED: similar to KIAA1822 protein                                                                                                                                                                                                                                 | RGD1311698 | XP_343108.3    | 1 | 2  | 1 | 2 | 0 | 0 | 0 | 0  |
| PREDICTED: similar to kinectin 1                                                                                                                                                                                                                                       | Ktn1       | XP_001073656.1 | 2 | 4  | 1 | 2 | 0 | 0 | 0 | 0  |
| PREDICTED: similar to Laminin alpha-5 chain precursor                                                                                                                                                                                                                  | Lama5      | XP_001060527.1 | 3 | 7  | 2 | 2 | 1 | 1 | 0 | 0  |
| PREDICTED: similar to Laminin gamma-1 chain precursor (Laminin B2 chain)                                                                                                                                                                                               | Lamc1      | XP_001071300.1 | 3 | 5  | 0 | 0 | 0 | 0 | 1 | 1  |

|                                                                                                                                                                                                                                                                        |            |                |   |   |   |   |   |   |   |    |
|------------------------------------------------------------------------------------------------------------------------------------------------------------------------------------------------------------------------------------------------------------------------|------------|----------------|---|---|---|---|---|---|---|----|
| PREDICTED: similar to mannosidase, beta A, lysosomal-like                                                                                                                                                                                                              | MGC109145  | XP_001067976.1 | 0 | 0 | 1 | 2 | 0 | 0 | 0 | 0  |
| PREDICTED: similar to mucin 1, transmembrane                                                                                                                                                                                                                           | Muc1       | XP_342282.3    | 1 | 1 | 0 | 0 | 0 | 0 | 0 | 0  |
| PREDICTED: similar to mucin 4                                                                                                                                                                                                                                          | Muc4       | XP_001072593.1 | 1 | 1 | 0 | 0 | 1 | 1 | 0 | 0  |
| PREDICTED: similar to Myeloid/lymphoid or mixed-lineage leukemia protein 2 (ALL1-related protein)                                                                                                                                                                      | Mll2       | XP_001062568.1 | 1 | 1 | 0 | 0 | 0 | 0 | 0 | 0  |
| PREDICTED: similar to myoferlin isoform b                                                                                                                                                                                                                              | RGD1564216 | XP_001080627.1 | 0 | 0 | 5 | 6 | 0 | 0 | 0 | 0  |
| PREDICTED: similar to Myosin heavy chain, cardiac muscle alpha isoform (MyHC-alpha)                                                                                                                                                                                    | RGD1565858 | XP_001064527.1 | 0 | 0 | 0 | 0 | 0 | 0 | 1 | 1  |
| PREDICTED: similar to myosin XVIIIa                                                                                                                                                                                                                                    | LOC360570  | XP_001080824.1 | 1 | 1 | 1 | 1 | 0 | 0 | 0 | 0  |
| PREDICTED: similar to Myosin-6 (Myosin VI)                                                                                                                                                                                                                             | RGD1560646 | XP_001061392.1 | 0 | 0 | 0 | 0 | 1 | 1 | 4 | 16 |
| PREDICTED: similar to neuropathy target esterase                                                                                                                                                                                                                       | RGD1564611 | XP_001057249.1 | 0 | 0 | 1 | 1 | 0 | 0 | 0 | 0  |
| PREDICTED: similar to nuclear mitotic apparatus protein 1 isoform 1                                                                                                                                                                                                    | Numa1      | XP_001068048.1 | 0 | 0 | 0 | 0 | 1 | 1 | 0 | 0  |
| PREDICTED: similar to oxidation resistance 1                                                                                                                                                                                                                           | Oxr1       | XP_001061721.1 | 0 | 0 | 0 | 0 | 0 | 0 | 1 | 2  |
| PREDICTED: similar to phosphoglucomutase 5                                                                                                                                                                                                                             | LOC687552  | XP_001080072.1 | 0 | 0 | 0 | 0 | 0 | 0 | 1 | 1  |
| PREDICTED: similar to Plastin-3 (T-plastin)                                                                                                                                                                                                                            | Pls3       | XP_001057538.1 | 1 | 1 | 1 | 2 | 1 | 1 | 7 | 9  |
| PREDICTED: similar to Probable ubiquitin carboxyl-terminal hydrolase FAF-X (Ubiquitin thioesterase FAF-X) (Ubiquitin-specific-processing protease FAF-X) (Deubiquitinating enzyme FAF-X) (Fat facets protein-related, X-linked) (Ubiquitin-specific protease 9, X c... | Usp9x      | XP_001056701.1 | 0 | 0 | 0 | 0 | 0 | 0 | 4 | 6  |
| PREDICTED: similar to processing of precursors 1 homolog isoform 2                                                                                                                                                                                                     | Pop1       | XP_001058648.1 | 0 | 0 | 1 | 1 | 0 | 0 | 0 | 0  |
| PREDICTED: similar to proteasome 26S non-ATPase subunit 8                                                                                                                                                                                                              | Psm8       | XP_001075072.1 | 0 | 0 | 0 | 0 | 1 | 1 | 0 | 0  |
| PREDICTED: similar to Protein CXorf17 homolog                                                                                                                                                                                                                          | LOC679485  | XP_001056595.1 | 0 | 0 | 0 | 0 | 1 | 1 | 0 | 0  |
| PREDICTED: similar to Putative deoxyribose-phosphate aldolase (Phosphodeoxyriboaldolase) (Deoxyriboaldolase) (DERA)                                                                                                                                                    | LOC686184  | XP_001071552.1 | 0 | 0 | 0 | 0 | 1 | 1 | 0 | 0  |
| PREDICTED: similar to Putative pre-mRNA-splicing factor ATP-dependent RNA helicase DHX15 (DEAH box protein 15)                                                                                                                                                         | Dhx15      | XP_001054651.1 | 0 | 0 | 0 | 0 | 0 | 0 | 2 | 2  |
| PREDICTED: similar to Putative RNA-binding protein 15 (RNA-binding motif protein 15) (One-twenty two protein)                                                                                                                                                          | LOC684233  | XP_001068152.1 | 0 | 0 | 1 | 1 | 0 | 0 | 0 | 0  |
| PREDICTED: similar to pyruvate kinase 3 isoform 1                                                                                                                                                                                                                      | RGD1561681 | XP_001054015.1 | 0 | 0 | 1 | 1 | 1 | 1 | 4 | 7  |
| PREDICTED: similar to RAN binding protein 3 isoform RANBP3-b                                                                                                                                                                                                           | LOC501281  | XP_576696.2    | 0 | 0 | 0 | 0 | 0 | 0 | 1 | 1  |
| PREDICTED: similar to Ras-GTPase-activating protein binding protein 1 (ATP dependent DNA helicase VIII) (GAP SH3-domain binding protein 1) (G3BP-1) (HDH-VIII)                                                                                                         | G3bp       | XP_340803.2    | 0 | 0 | 0 | 0 | 1 | 1 | 0 | 0  |
| PREDICTED: similar to rho guanine nucleotide exchange factor 5 isoform 1                                                                                                                                                                                               | Arhgef5    | XP_342677.2    | 0 | 0 | 1 | 1 | 0 | 0 | 0 | 0  |
| PREDICTED: similar to ribosomal protein L21                                                                                                                                                                                                                            | LOC679392  | XP_001056134.1 | 0 | 0 | 0 | 0 | 0 | 0 | 1 | 1  |
| PREDICTED: similar to Ribosome-binding protein 1 (Ribosome receptor protein) (mRRP) isoform 2                                                                                                                                                                          | Rrbp1      | XP_001053614.1 | 1 | 1 | 0 | 0 | 0 | 0 | 0 | 0  |
| PREDICTED: similar to RIKEN cDNA 5730590G19-like                                                                                                                                                                                                                       | RGD1308541 | XP_001065296.1 | 0 | 0 | 0 | 0 | 0 | 0 | 1 | 2  |
| PREDICTED: similar to RNA binding motif protein 15B                                                                                                                                                                                                                    | Rbm15b     | XP_001074007.1 | 0 | 0 | 0 | 0 | 0 | 0 | 1 | 1  |
| PREDICTED: similar to secreted nidogen domain protein                                                                                                                                                                                                                  | Sned1      | XP_001068874.1 | 1 | 2 | 0 | 0 | 0 | 0 | 0 | 0  |
| PREDICTED: similar to serine/threonine kinase                                                                                                                                                                                                                          | LOC365107  | XP_001063111.1 | 1 | 1 | 0 | 0 | 0 | 0 | 0 | 0  |
| PREDICTED: similar to SET domain-containing protein                                                                                                                                                                                                                    | LOC689820  | XP_001072149.1 | 0 | 0 | 0 | 0 | 0 | 0 | 1 | 1  |
| PREDICTED: similar to signal peptidase complex subunit 2 homolog                                                                                                                                                                                                       | Spcs2      | XP_001066421.1 | 1 | 1 | 2 | 2 | 1 | 2 | 0 | 0  |
| PREDICTED: similar to solute carrier family 25 (mitochondrial carrier, Aralar), member 12                                                                                                                                                                              | RGD1561141 | XP_230015.2    | 1 | 2 | 0 | 0 | 0 | 0 | 0 | 0  |
| PREDICTED: similar to SON protein                                                                                                                                                                                                                                      | Son        | XP_001068992.1 | 0 | 0 | 0 | 0 | 0 | 0 | 1 | 1  |
| PREDICTED: similar to Sorting nexin-9                                                                                                                                                                                                                                  | LOC683687  | XP_001067064.1 | 1 | 1 | 1 | 2 | 1 | 2 | 2 | 3  |
| PREDICTED: similar to Succinyl-CoA ligase                                                                                                                                                                                                                              | Suc1g2     | XP_001074487.1 | 2 | 2 | 0 | 0 | 0 | 0 | 0 | 0  |
| PREDICTED: similar to Talin-1                                                                                                                                                                                                                                          | Tln1       | XP_001069865.1 | 0 | 0 | 0 | 0 | 1 | 1 | 9 | 13 |



|                                                                                                                            |            |                |   |   |   |   |   |   |   |    |
|----------------------------------------------------------------------------------------------------------------------------|------------|----------------|---|---|---|---|---|---|---|----|
| PREDICTED: similar to Talin-2 isoform 1                                                                                    | RGD1565416 | XP_001056519.1 | 1 | 2 | 0 | 0 | 1 | 1 | 0 | 0  |
| PREDICTED: similar to tensin                                                                                               | Tns        | XP_001055943.1 | 1 | 1 | 0 | 0 | 0 | 0 | 0 | 0  |
| PREDICTED: similar to Transcriptional activator protein Pur-alpha (Purine-rich single-stranded DNA-binding protein alpha)  | Pura       | XP_001063244.1 | 0 | 0 | 0 | 0 | 1 | 1 | 0 | 0  |
| PREDICTED: similar to Tripartite motif protein 56                                                                          | LOC687035  | XP_001076813.1 | 0 | 0 | 0 | 0 | 1 | 1 | 0 | 0  |
| PREDICTED: similar to tripartite motif protein TRIM5 isoform alpha                                                         | RGD1563970 | XP_001073792.1 | 0 | 0 | 0 | 0 | 1 | 1 | 0 | 0  |
| PREDICTED: similar to tubulin-specific chaperone d                                                                         | LOC363309  | XP_001081857.1 | 0 | 0 | 0 | 0 | 0 | 0 | 1 | 1  |
| PREDICTED: similar to very large G-protein coupled receptor 1                                                              | LOC362068  | XP_001056150.1 | 0 | 0 | 0 | 0 | 0 | 0 | 1 | 1  |
| PREDICTED: similar to Vomeronasal secretory protein 2 precursor (Vomeronasal secretory protein II) (VNSP II) (Lipocalin-4) | LOC681375  | XP_001061474.1 | 0 | 0 | 0 | 0 | 1 | 1 | 0 | 0  |
| PREDICTED: similar to Y-box-binding protein 2 (Germ cell-specific Y-box-binding protein) (FRGY2 homolog)                   | Ybx2       | XP_001079683.1 | 0 | 0 | 0 | 0 | 0 | 0 | 1 | 1  |
| PREDICTED: similar to Zinc finger protein 208                                                                              | LOC682206  | XP_001060419.1 | 0 | 0 | 0 | 0 | 0 | 0 | 1 | 1  |
| PREDICTED: similar to Zinc finger protein GLI3                                                                             | Gli3       | XP_001054276.1 | 0 | 0 | 1 | 1 | 0 | 0 | 0 | 0  |
| profilin 1                                                                                                                 | Pfn1       | NP_071956.2    | 0 | 0 | 0 | 0 | 0 | 0 | 7 | 13 |
| profilin 2                                                                                                                 | Pfn2       | NP_110500.1    | 0 | 0 | 0 | 0 | 0 | 0 | 1 | 1  |
| programmed cell death 6 interacting protein                                                                                | Pdcd6ip    | NP_001025081.1 | 0 | 0 | 0 | 0 | 0 | 0 | 1 | 2  |
| prohibitin 2                                                                                                               | Phb2       | NP_001013053.1 | 2 | 3 | 0 | 0 | 0 | 0 | 0 | 0  |
| prolyl 4-hydroxylase, beta polypeptide                                                                                     | P4hb       | NP_037130.1    | 7 | 8 | 2 | 2 | 0 | 0 | 1 | 1  |
| prolyl endopeptidase                                                                                                       | Prep       | NP_112614.1    | 0 | 0 | 0 | 0 | 0 | 0 | 1 | 1  |
| propionyl Coenzyme A carboxylase, beta polypeptide                                                                         | Pccb       | NP_058726.2    | 1 | 1 | 0 | 0 | 0 | 0 | 0 | 0  |
| propionyl-coenzyme A carboxylase, alpha polypeptide                                                                        | Pcca       | NP_062203.1    | 1 | 1 | 0 | 0 | 0 | 0 | 0 | 0  |
| prostaglandin-endoperoxide synthase 1                                                                                      | Ptgs1      | NP_058739.3    | 3 | 4 | 1 | 2 | 0 | 0 | 0 | 0  |
| protease (prosome, macropain) 28 subunit, alpha                                                                            | Psme1      | NP_058960.2    | 0 | 0 | 1 | 1 | 2 | 3 | 1 | 2  |
| proteasome (prosome, macropain) 26S subunit, ATPase 2                                                                      | Psme2      | NP_150239.1    | 0 | 0 | 0 | 0 | 1 | 2 | 1 | 1  |
| proteasome (prosome, macropain) 26S subunit, non-ATPase, 1                                                                 | Psmd1      | NP_114184.1    | 0 | 0 | 0 | 0 | 1 | 1 | 0 | 0  |
| proteasome (prosome, macropain) 26S subunit, non-ATPase, 13                                                                | Psmd13     | NP_001102395.1 | 0 | 0 | 0 | 0 | 1 | 1 | 0 | 0  |
| proteasome (prosome, macropain) 26S subunit, non-ATPase, 2                                                                 | Psmd2      | NP_001026809.1 | 0 | 0 | 0 | 0 | 2 | 3 | 0 | 0  |
| proteasome (prosome, macropain) subunit, alpha type 1                                                                      | Psm1       | NP_058974.1    | 0 | 0 | 1 | 1 | 1 | 1 | 0 | 0  |
| proteasome (prosome, macropain) subunit, alpha type 2                                                                      | Psm2       | NP_058975.1    | 0 | 0 | 0 | 0 | 1 | 1 | 0 | 0  |
| proteasome (prosome, macropain) subunit, alpha type 3                                                                      | Psm3       | NP_058976.1    | 0 | 0 | 0 | 0 | 1 | 1 | 0 | 0  |
| proteasome (prosome, macropain) subunit, alpha type 4                                                                      | Psm4       | NP_058977.1    | 0 | 0 | 0 | 0 | 1 | 1 | 0 | 0  |
| proteasome (prosome, macropain) subunit, alpha type 6                                                                      | Psm6       | NP_058979.1    | 0 | 0 | 0 | 0 | 1 | 2 | 0 | 0  |
| proteasome (prosome, macropain) subunit, alpha type 7                                                                      | Psm7       | NP_001008218.1 | 0 | 0 | 0 | 0 | 1 | 1 | 0 | 0  |
| proteasome (prosome, macropain) subunit, beta type 1                                                                       | Psb1       | NP_446042.1    | 0 | 0 | 0 | 0 | 1 | 1 | 0 | 0  |
| proteasome (prosome, macropain) subunit, beta type 2                                                                       | Psb2       | NP_058980.1    | 0 | 0 | 0 | 0 | 1 | 1 | 0 | 0  |
| proteasome (prosome, macropain) subunit, beta type 5                                                                       | Psb5       | NP_001099197.2 | 0 | 0 | 0 | 0 | 1 | 1 | 0 | 0  |
| proteasome (prosome, macropain) subunit, beta type 6                                                                       | Psb6       | NP_476440.2    | 0 | 0 | 0 | 0 | 2 | 3 | 0 | 0  |
| proteasome activator subunit 2                                                                                             | Psme2      | NP_058953.1    | 0 | 0 | 0 | 0 | 2 | 2 | 0 | 0  |
| protein disulfide isomerase associated 3                                                                                   | Pdia3      | NP_059015.1    | 6 | 8 | 4 | 5 | 3 | 3 | 2 | 3  |
| protein disulfide isomerase associated 6                                                                                   | Pdia6      | NP_001004442.1 | 1 | 1 | 1 | 1 | 0 | 0 | 0 | 0  |
| protein kinase C and casein kinase substrate in neurons 2                                                                  | Pacsin2    | NP_570096.2    | 0 | 0 | 0 | 0 | 0 | 0 | 2 | 2  |
| protein kinase C substrate 80K-H                                                                                           | PrkcsH     | NP_001100276.1 | 2 | 3 | 1 | 1 | 0 | 0 | 1 | 1  |
| protein phosphatase 1, catalytic subunit, beta                                                                             | Ppp1cb     | NP_037197.1    | 0 | 0 | 1 | 1 | 0 | 0 | 1 | 1  |
| protein phosphatase 2 (formerly 2A), regulatory subunit A (PR 65), beta isoform                                            | Ppp2r1b    | NP_001020589.1 | 0 | 0 | 0 | 0 | 0 | 0 | 1 | 1  |
| protein phosphatase 4, regulatory subunit 2                                                                                | Ppp4r2     | NP_001100083.1 | 0 | 0 | 0 | 0 | 0 | 0 | 2 | 3  |
| protein regulator of cytokinesis 1                                                                                         | Prc1       | NP_001100999.1 | 0 | 0 | 1 | 1 | 0 | 0 | 0 | 0  |
| protein tyrosine phosphatase, non-receptor type 12                                                                         | Ptpn12     | NP_476456.2    | 0 | 0 | 1 | 1 | 0 | 0 | 0 | 0  |
| protein tyrosine phosphatase, receptor type, f polypeptide (PTPRF), interacting protein (liprin), alpha 2                  | Ppfia2     | NP_001102215.1 | 0 | 0 | 0 | 0 | 0 | 0 | 1 | 1  |
| proteolipid protein 2                                                                                                      | Pip2       | NP_997484.1    | 0 | 0 | 2 | 4 | 0 | 0 | 0 | 0  |

|                                                                                         |          |                |   |   |   |   |    |    |    |
|-----------------------------------------------------------------------------------------|----------|----------------|---|---|---|---|----|----|----|
| prothymosin alpha                                                                       | Ptma     | NP_068508.1    | 2 | 3 | 1 | 1 | 0  | 0  | 0  |
| pyruvate dehydrogenase E1 alpha 1                                                       | Pdha1    | NP_001004072.2 | 1 | 1 | 0 | 0 | 0  | 0  | 0  |
| pyruvate kinase, liver and red blood cell                                               | Pklr     | NP_036756.2    | 1 | 1 | 0 | 0 | 1  | 2  | 2  |
| pyruvate kinase, muscle                                                                 | Pkm2     | NP_445749.1    | 4 | 5 | 4 | 4 | 14 | 20 | 24 |
| RAB10, member RAS oncogene family                                                       | Rab10    | NP_059055.2    | 2 | 3 | 2 | 4 | 1  | 1  | 0  |
| RAB11a, member RAS oncogene family                                                      | Rab11a   | NP_112414.1    | 1 | 1 | 1 | 2 | 1  | 1  | 0  |
| RAB25, member RAS oncogene family                                                       | Rab25    | NP_001101157.2 | 0 | 0 | 1 | 1 | 0  | 0  | 0  |
| RAB2A, member RAS oncogene family                                                       | Rab2a    | NP_113906.1    | 0 | 0 | 1 | 1 | 0  | 0  | 0  |
| RAB5A, member RAS oncogene family                                                       | Rab5a    | NP_073183.1    | 0 | 0 | 2 | 2 | 0  | 0  | 0  |
| RAB5B, member RAS oncogene family                                                       | Rab5b    | NP_001073405.1 | 0 | 0 | 1 | 1 | 0  | 0  | 0  |
| RAB5C, member RAS oncogene family                                                       | Rab5c    | NP_001099310.1 | 1 | 2 | 1 | 1 | 0  | 0  | 0  |
| RAB8A, member RAS oncogene family                                                       | Rab8a    | NP_446450.2    | 0 | 0 | 1 | 2 | 0  | 0  | 0  |
| RAN, member RAS oncogene family                                                         | Ran      | NP_445891.1    | 0 | 0 | 0 | 0 | 0  | 0  | 2  |
| ras homolog gene family, member B                                                       | Rhob     | NP_071987.1    | 0 | 0 | 0 | 0 | 0  | 0  | 1  |
| ras homolog gene family, member C                                                       | Rhoc     | NP_001099931.1 | 0 | 0 | 0 | 0 | 0  | 0  | 1  |
| ras homolog gene family, member Q                                                       | Rhoq     | NP_445974.1    | 0 | 0 | 1 | 2 | 0  | 0  | 1  |
| RAS related protein 1b                                                                  | Rap1b    | NP_599173.2    | 0 | 0 | 1 | 1 | 0  | 0  | 0  |
| ras-related G3 botulinum toxin substrate 1 (rho family, small GTP binding protein Rac1) | Rac1     | NP_599193.1    | 1 | 1 | 0 | 0 | 0  | 0  | 1  |
| reticulocalbin 3, EF-hand calcium binding domain                                        | Rcn3     | NP_001008694.1 | 0 | 0 | 1 | 1 | 0  | 0  | 0  |
| reticulon 3 isoform A1                                                                  | Rtn3     | NP_001009953.2 | 1 | 1 | 0 | 0 | 0  | 0  | 0  |
| reticulon 4                                                                             | Rtn4     | NP_114019.1    | 2 | 3 | 2 | 2 | 1  | 1  | 0  |
| retinoic acid induced 14                                                                | Rai14    | NP_001011947.1 | 0 | 0 | 1 | 1 | 0  | 0  | 0  |
| Rho GDP dissociation inhibitor (GDI) alpha                                              | Arhgdia  | NP_001007006.1 | 0 | 0 | 0 | 0 | 0  | 0  | 1  |
| Rho GTPase activating protein 12                                                        | Artgap12 | NP_001100827.1 | 1 | 1 | 1 | 1 | 0  | 0  | 1  |
| Rho, GDP dissociation inhibitor (GDI) beta                                              | Arhgdib  | NP_001009600.1 | 0 | 0 | 0 | 0 | 0  | 0  | 1  |
| ribonuclease/angiogenin inhibitor 1                                                     | Rnh1     | NP_620805.1    | 0 | 0 | 0 | 0 | 0  | 0  | 2  |
| ribophorin I                                                                            | Rpn1     | NP_037199.1    | 0 | 0 | 3 | 5 | 0  | 0  | 0  |
| ribophorin II                                                                           | Rpn2     | NP_113886.1    | 0 | 0 | 1 | 2 | 0  | 0  | 0  |
| ribosomal protein L13                                                                   | Rpl13    | NP_112363.1    | 0 | 0 | 1 | 2 | 1  | 2  | 0  |
| ribosomal protein L13A                                                                  | Rpl13a   | NP_775462.2    | 1 | 1 | 1 | 1 | 0  | 0  | 0  |
| ribosomal protein L18                                                                   | Rpl18    | NP_112364.1    | 0 | 0 | 0 | 0 | 1  | 1  | 0  |
| ribosomal protein L19                                                                   | Rpl19    | NP_112365.1    | 0 | 0 | 0 | 0 | 1  | 1  | 0  |
| ribosomal protein L21                                                                   | Rpl21    | NP_445782.1    | 0 | 0 | 0 | 0 | 1  | 2  | 0  |
| ribosomal protein L3                                                                    | Rpl3     | NP_942048.1    | 0 | 0 | 0 | 0 | 3  | 3  | 0  |
| ribosomal protein L32                                                                   | Rpl32    | NP_037358.1    | 0 | 0 | 1 | 1 | 0  | 0  | 0  |
| ribosomal protein L6                                                                    | Rpl6     | NP_446423.2    | 0 | 0 | 0 | 0 | 2  | 3  | 0  |
| ribosomal protein L9                                                                    | Rpl9     | NP_001007599.3 | 1 | 2 | 1 | 2 | 2  | 2  | 0  |
| ribosomal protein S11                                                                   | Rps11    | NP_112372.1    | 0 | 0 | 0 | 0 | 1  | 1  | 1  |
| ribosomal protein S13                                                                   | Rps13    | NP_569116.1    | 0 | 0 | 0 | 0 | 1  | 1  | 0  |
| ribosomal protein S14                                                                   | Rps14    | NP_073163.1    | 0 | 0 | 0 | 0 | 1  | 1  | 0  |
| ribosomal protein S18                                                                   | Rps18    | NP_998722.1    | 0 | 0 | 0 | 0 | 1  | 1  | 0  |
| ribosomal protein S23                                                                   | Rps23    | NP_511172.1    | 0 | 0 | 0 | 0 | 1  | 2  | 0  |
| ribosomal protein S26                                                                   | Rps26    | NP_037356.1    | 0 | 0 | 0 | 0 | 1  | 1  | 0  |
| ribosomal protein S3                                                                    | Rps3     | NP_001009239.1 | 0 | 0 | 0 | 0 | 1  | 1  | 0  |
| ribosomal protein S4, X-linked                                                          | Rps4x    | NP_001007601.1 | 0 | 0 | 0 | 0 | 1  | 2  | 0  |
| ribosomal protein S8                                                                    | Rps8     | NP_113894.1    | 0 | 0 | 0 | 0 | 1  | 2  | 0  |
| ribosomal protein S9                                                                    | Rps9     | NP_112370.2    | 0 | 0 | 0 | 0 | 2  | 2  | 0  |
| ribosomal protein, large, P1                                                            | Rplp1    | NP_001007605.1 | 0 | 0 | 0 | 0 | 1  | 1  | 0  |
| ring finger protein 25                                                                  | Rnf25    | NP_001012004.2 | 0 | 0 | 0 | 0 | 0  | 0  | 1  |
| RNA binding motif and ELMO/CED-12 domain 1                                              | Rbed1    | NP_001013105.1 | 0 | 0 | 0 | 0 | 0  | 0  | 1  |
| RNA binding motif protein 20                                                            | Rbm20    | NP_001101081.1 | 0 | 0 | 0 | 0 | 0  | 0  | 1  |
| RNA binding motif protein, X chromosome                                                 | Rbmx     | NP_001020834.1 | 0 | 0 | 0 | 0 | 1  | 1  | 0  |
| RNA polymerase II transcriptional coactivator                                           | Sub1     | NP_001009618.1 | 0 | 0 | 0 | 0 | 0  | 0  | 1  |
| S100 calcium binding protein A11                                                        | S100a11  | NP_001004095.1 | 0 | 0 | 0 | 0 | 0  | 0  | 1  |
| S100 calcium binding protein A16                                                        | S100a16  | NP_001102027.1 | 0 | 0 | 0 | 0 | 0  | 0  | 1  |
| SAC1 (suppressor of actin mutations 1, homolog)-like                                    | Sacm1l   | NP_446250.1    | 1 | 1 | 1 | 1 | 0  | 0  | 0  |
| S-adenosylhomocysteine hydrolase                                                        | Ahcy     | NP_058897.1    | 2 | 2 | 1 | 1 | 0  | 0  | 4  |
| S-adenosylhomocysteine hydrolase-like 1                                                 | Ahcy1l   | NP_001102031.1 | 0 | 0 | 0 | 0 | 1  | 1  | 1  |
| scavenger receptor class B, member 2                                                    | Scarb2   | NP_446453.1    | 0 | 0 | 0 | 0 | 1  | 1  | 0  |
| scinderin                                                                               | Scin     | NP_942043.1    | 0 | 0 | 0 | 0 | 0  | 0  | 4  |
| SEC31 homolog A                                                                         | Sec31a   | NP_148981.1    | 0 | 0 | 1 | 1 | 0  | 0  | 0  |
| Sec61 alpha subunit homolog                                                             | Sec61a1  | NP_954865.1    | 0 | 0 | 1 | 2 | 0  | 0  | 0  |
| septin 11                                                                               | 11-Sep   | NP_001100678.1 | 0 | 0 | 1 | 1 | 0  | 0  | 0  |
| sequestosome 1 isoform 1                                                                | Sqstm1   | NP_787037.2    | 0 | 0 | 0 | 0 | 0  | 0  | 1  |
| serine (or cysteine) peptidase inhibitor, clade H, member 1                             | Serpinh1 | NP_058869.1    | 1 | 1 | 0 | 0 | 0  | 0  | 0  |
| serine/threonine kinase 2                                                               | Slk      | NP_062222.2    | 0 | 0 | 1 | 1 | 0  | 0  | 1  |
| signal transducer and activator of transcription 1 isoform beta                         | Stat1    | NP_001029336.1 | 0 | 0 | 0 | 0 | 0  | 0  | 2  |
| sirtuin 4                                                                               | Sirt4    | NP_001100617.1 | 0 | 0 | 0 | 0 | 0  | 0  | 1  |
| Sjogren syndrome antigen B                                                              | Ssb      | NP_112381.2    | 1 | 1 | 0 | 0 | 1  | 1  | 0  |





## Calculation of fraction of 17,000 g protein that is derived from plasma membranes:

Spectral counts of all proteins were divided by their respective molecular weights to obtain normalized spectral counts. Plasma membrane proteins were selected using Gene Ontology *Cell Component* terms and literature inspection.

Total protein spectral counts - 973.366

Plasma membrane spectral count – 105.612

Percentage plasma membrane – 11%

### Plasma Membrane Proteins Identified in 17K Pellet:

| <i>Gene ID</i> | <i>Protein</i>                                                                                                                                      | <i>Count</i> |
|----------------|-----------------------------------------------------------------------------------------------------------------------------------------------------|--------------|
| Aqp2           | aquaporin 2                                                                                                                                         | 10.36963     |
| Aqp4           | aquaporin 4                                                                                                                                         | 2.900219     |
| Rnpep          | arginyl aminopeptidase (aminopeptidase B)                                                                                                           | 1.381738     |
| Atp1a1         | ATPase, Na <sup>+</sup> /K <sup>+</sup> transporting, alpha 1 polypeptide                                                                           | 7.960778     |
| Atp1b1         | ATPase, Na <sup>+</sup> /K <sup>+</sup> transporting, beta 1 polypeptide                                                                            | 8.522342     |
| Bcam           | basal cell adhesion molecule                                                                                                                        | 2.962449     |
| Cd151          | CD151 molecule (Raph blood group)                                                                                                                   | 3.526684     |
| Cd59b          | CD59b molecule, complement regulatory protein                                                                                                       | 7.251495     |
| Cd9            | CD9 antigen                                                                                                                                         | 3.965909     |
| Fxyd4          | corticosteroid-induced protein precursor                                                                                                            | 11.00874     |
| Emcn           | endomucin                                                                                                                                           | 3.771326     |
| Itgb1          | integrin beta 1                                                                                                                                     | 5.659664     |
| Lnpep          | leucyl/cystinyl aminopeptidase isoform 1                                                                                                            | 2.559696     |
| Lamp1          | lysosomal-associated membrane protein 1                                                                                                             | 6.82297      |
| Mal2           | MAL2 proteolipid protein                                                                                                                            | 5.209522     |
| Atp1a3         | Na <sup>+</sup> /K <sup>+</sup> -ATPase alpha 3 subunit                                                                                             | 7.159761     |
| Itga2          | PREDICTED: similar to Integrin alpha-2 precursor (Platelet membrane glycoprotein Ia) (GPIa) (Collagen receptor) (VLA-2 alpha chain) (CD49b antigen) | 0.776164     |
| Slc14a2        | solute carrier family 14 (urea transporter), member 2 isoform 1                                                                                     | 0.981375     |
| Syng2          | synaptogyrin 2                                                                                                                                      | 3.889685     |
| Tacstd1        | tumor-associated calcium signal transducer 1                                                                                                        | 5.680626     |
| Vdac1          | voltage-dependent anion channel 1                                                                                                                   | 3.25145      |

**Calculation of fraction of 200,000 g protein that is derived from plasma membranes:**

The same calculation method was utilized for this fraction as for the 17K fraction.

Total protein spectral counts – 926.811

Plasma membrane spectral count – 15.023

Percentage plasma membrane – 2%

**Plasma Membrane Proteins Identified in 200K Pellet:**

| <i>Gene ID</i> | <i>Protein</i>                                                            | <i>Count</i> |
|----------------|---------------------------------------------------------------------------|--------------|
| Aqp2           | aquaporin 2                                                               | 3.456544     |
| Atp1a1         | ATPase, Na <sup>+</sup> /K <sup>+</sup> transporting, alpha 1 polypeptide | 0.884531     |
| Bcam           | basal cell adhesion molecule                                              | 1.481225     |
| Grid1          | glutamate receptor, ionotropic, delta 1                                   | 0.891862     |
| Lamp1          | lysosomal-associated membrane protein 1                                   | 2.274323     |
| Atp1a3         | Na <sup>+</sup> /K <sup>+</sup> -ATPase alpha 3 subunit                   | 1.78994      |
| Muc4           | PREDICTED: similar to mucin 4                                             | 0.354701     |
| Syng2          | synaptogyrin 2                                                            | 3.889685     |

## Dotblot of the new anti-pS261-AQP2 (#1028) antibody

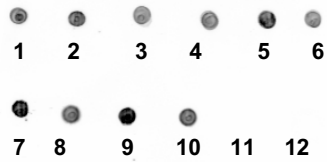

streptavidin-800

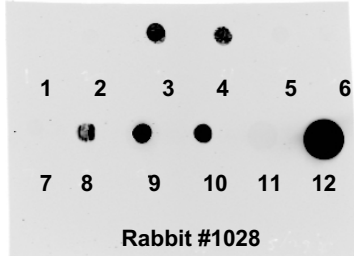

anti-pS261-AQP2

| <u>Spot #</u> | <u>Peptide</u>              |
|---------------|-----------------------------|
| 1             | non-phospho                 |
| 2             | pS256                       |
| 3             | pS261                       |
| 4             | pS256/pS261                 |
| 5             | pS269                       |
| 6             | pS256/pS269                 |
| 7             | pS264                       |
| 8             | pS256/pS261/pS264           |
| 9             | pS256/pS261/pS264/pS269     |
| 10            | pS256/pS261/pS269           |
| 11            | antigen peptide (- phospho) |
| 12            | antigen peptide (+ phospho) |

Result: Anti-pS261-AQP2 antibody recognizes only AQP2 peptides phosphorylated at S261. (Peptides 1-10 were biotinylated and could therefore be detected using a streptavidin conjugate as a control for loading.)

## Dotblot of the new anti-pS256-AQP2 (#1697) antibody

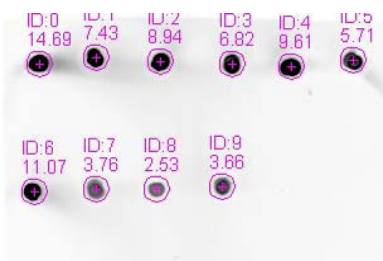

streptavidin-800

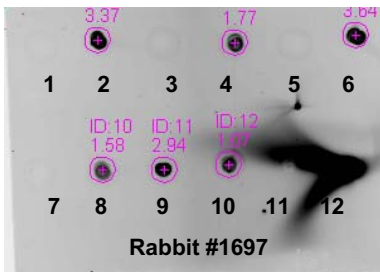

anti-pS256-AQP2

### Spot #

- 1
- 2
- 3
- 4
- 5
- 6
- 7
- 8
- 9
- 10
- 11
- 12

### Peptide

- non-phospho
- pS256
- pS261
- pS256/pS261
- pS269
- pS256/pS269
- pS264
- pS256/pS261/pS264
- pS256/pS261/pS264/pS269
- pS256/pS261/pS269
- antigen peptide (- phospho)
- antigen peptide (+ phospho)

Result: Anti-pS256-AQP2 antibody recognizes only AQP2 peptides phosphorylated at S256. (Peptides 1-10 were biotinylated and could therefore be detected using a streptavidin conjugate as a control for loading.)
